# Supplementary material for: TOP2A Drives Hepatocellular Carcinoma Progression: Integrative Multi-Omics Analysis Reveals Prognostic Power and Actionable Mechanisms
Source: Research Square preprint supplement (doi:10.21203/rs.3.rs-6698064/v1), 2025-06-08
Supplement: Supplementary file 1 [file 0faf645705927a7220b4f137.xlsx]

## Sheet: Supplementary table 1
	source	target	ligand	receptor	prob	pval	interaction_name	interaction_name_2	pathway_name	annotation	evidence
1	Hepatocytes_TOP2A_High	Endothelial_cells	GDF15	TGFBR2	0.00813065231391379	0	GDF15_TGFBR2	GDF15 - TGFBR2	GDF	Secreted Signaling	KEGG: hsa04350
2	Hepatocytes_TOP2A_Low	Endothelial_cells	GDF15	TGFBR2	0.00574757946616642	0	GDF15_TGFBR2	GDF15 - TGFBR2	GDF	Secreted Signaling	KEGG: hsa04350
3	B_cell	Hepatocytes_TOP2A_High	AREG	EGFR	0.000703969503012666	0	AREG_EGFR	AREG - EGFR	EGF	Secreted Signaling	KEGG: hsa04012
4	DC	Hepatocytes_TOP2A_High	AREG	EGFR	0.0014322352384115	0	AREG_EGFR	AREG - EGFR	EGF	Secreted Signaling	KEGG: hsa04012
5	Monocyte	Hepatocytes_TOP2A_High	AREG	EGFR	0.00182404116470035	0	AREG_EGFR	AREG - EGFR	EGF	Secreted Signaling	KEGG: hsa04012
6	Endothelial_cells	Hepatocytes_TOP2A_High	HBEGF	EGFR	0.000405328996557966	0	HBEGF_EGFR	HBEGF - EGFR	EGF	Secreted Signaling	KEGG: hsa04012
7	Monocyte	Hepatocytes_TOP2A_High	EREG	EGFR	0.000908176266417186	0	EREG_EGFR	EREG - EGFR	EGF	Secreted Signaling	KEGG: hsa04012
8	Smooth_muscle_cells	Smooth_muscle_cells	PDGFA	PDGFRB	0.00179047196309358	0	PDGFA_PDGFRB	PDGFA - PDGFRB	PDGF	Secreted Signaling	PMID: 15207812
9	Endothelial_cells	Smooth_muscle_cells	PDGFB	PDGFRB	0.000870014180317959	0	PDGFB_PDGFRB	PDGFB - PDGFRB	PDGF	Secreted Signaling	PMID: 15207812
10	Endothelial_cells	Smooth_muscle_cells	PDGFD	PDGFRB	0.00219626789929499	0	PDGFD_PDGFRB	PDGFD - PDGFRB	PDGF	Secreted Signaling	PMID: 15207812
11	Hepatocytes_TOP2A_High	Endothelial_cells	VEGFA	FLT1	0.00273925748936989	0	VEGFA_VEGFR1	VEGFA - VEGFR1	VEGF	Secreted Signaling	KEGG: hsa04370; PMID: 16633338
12	Hepatocytes_TOP2A_Low	Endothelial_cells	VEGFA	FLT1	0.00239140757891618	0	VEGFA_VEGFR1	VEGFA - VEGFR1	VEGF	Secreted Signaling	KEGG: hsa04370; PMID: 16633338
13	Macrophage	Endothelial_cells	VEGFA	FLT1	0.00549689544958557	0	VEGFA_VEGFR1	VEGFA - VEGFR1	VEGF	Secreted Signaling	KEGG: hsa04370; PMID: 16633338
14	Monocyte	Endothelial_cells	VEGFA	FLT1	0.00865798154713089	0	VEGFA_VEGFR1	VEGFA - VEGFR1	VEGF	Secreted Signaling	KEGG: hsa04370; PMID: 16633338
15	Hepatocytes_TOP2A_High	Endothelial_cells	VEGFA	KDR	0.00124952630074577	0	VEGFA_VEGFR2	VEGFA - VEGFR2	VEGF	Secreted Signaling	KEGG: hsa04370; PMID: 16633338
16	Hepatocytes_TOP2A_Low	Endothelial_cells	VEGFA	KDR	0.00109064589547159	0	VEGFA_VEGFR2	VEGFA - VEGFR2	VEGF	Secreted Signaling	KEGG: hsa04370; PMID: 16633338
17	Macrophage	Endothelial_cells	VEGFA	KDR	0.00251121342730689	0	VEGFA_VEGFR2	VEGFA - VEGFR2	VEGF	Secreted Signaling	KEGG: hsa04370; PMID: 16633338
18	Monocyte	Endothelial_cells	VEGFA	KDR	0.00396217126027185	0	VEGFA_VEGFR2	VEGFA - VEGFR2	VEGF	Secreted Signaling	KEGG: hsa04370; PMID: 16633338
19	Endothelial_cells	Endothelial_cells	VEGFC	FLT4	0.000201434276672713	0	VEGFC_VEGFR3	VEGFC - VEGFR3	VEGF	Secreted Signaling	KEGG: hsa04370; PMID: 16633338
20	Endothelial_cells	Endothelial_cells	VEGFC	KDR	0.00136802406062431	0	VEGFC_VEGFR2	VEGFC - VEGFR2	VEGF	Secreted Signaling	KEGG: hsa04370; PMID: 16633338
21	Endothelial_cells	Endothelial_cells	PGF	FLT1	0.00399665627447705	0	PGF_VEGFR1	PGF - VEGFR1	VEGF	Secreted Signaling	KEGG: hsa04370; PMID: 16633338
22	Smooth_muscle_cells	Endothelial_cells	PGF	FLT1	0.0286864606012226	0	PGF_VEGFR1	PGF - VEGFR1	VEGF	Secreted Signaling	KEGG: hsa04370; PMID: 16633338
23	Hepatocytes_TOP2A_High	Endothelial_cells	VEGFA	FLT1_KDR	0.00194800158040279	0	VEGFA_VEGFR1R2	VEGFA - VEGFR1R2	VEGF	Secreted Signaling	PMID: 16633338
24	Hepatocytes_TOP2A_Low	Endothelial_cells	VEGFA	FLT1_KDR	0.00170045950190295	0	VEGFA_VEGFR1R2	VEGFA - VEGFR1R2	VEGF	Secreted Signaling	PMID: 16633338
25	Macrophage	Endothelial_cells	VEGFA	FLT1_KDR	0.00391219917093827	0	VEGFA_VEGFR1R2	VEGFA - VEGFR1R2	VEGF	Secreted Signaling	PMID: 16633338
26	Monocyte	Endothelial_cells	VEGFA	FLT1_KDR	0.00616762956419578	0	VEGFA_VEGFR1R2	VEGFA - VEGFR1R2	VEGF	Secreted Signaling	PMID: 16633338
27	Endothelial_cells	Endothelial_cells	VEGFC	FLT4_KDR	0.000552833401027733	0	VEGFC_VEGFR2R3	VEGFC - VEGFR2R3	VEGF	Secreted Signaling	PMID: 16633338
28	Endothelial_cells	Macrophage	CCL5	CCR1	0.00068794836712963	0	CCL5_CCR1	CCL5 - CCR1	CCL	Secreted Signaling	KEGG: hsa04060
29	Macrophage	Macrophage	CCL5	CCR1	0.00104156948680995	0	CCL5_CCR1	CCL5 - CCR1	CCL	Secreted Signaling	KEGG: hsa04060
30	NK/T cells	Macrophage	CCL5	CCR1	0.00663166618759705	0	CCL5_CCR1	CCL5 - CCR1	CCL	Secreted Signaling	KEGG: hsa04060
31	B_cell	Macrophage	CCL3	CCR1	0.00134134053794478	0	CCL3_CCR1	CCL3 - CCR1	CCL	Secreted Signaling	KEGG: hsa04060
32	DC	Macrophage	CCL3	CCR1	0.00107273664345143	0	CCL3_CCR1	CCL3 - CCR1	CCL	Secreted Signaling	KEGG: hsa04060
33	Endothelial_cells	Macrophage	CCL3	CCR1	0.00160343571346169	0	CCL3_CCR1	CCL3 - CCR1	CCL	Secreted Signaling	KEGG: hsa04060
34	Hepatocytes_TOP2A_High	Macrophage	CCL3	CCR1	0.000881532947114752	0	CCL3_CCR1	CCL3 - CCR1	CCL	Secreted Signaling	KEGG: hsa04060
35	Hepatocytes_TOP2A_Low	Macrophage	CCL3	CCR1	0.000755875444233945	0	CCL3_CCR1	CCL3 - CCR1	CCL	Secreted Signaling	KEGG: hsa04060
36	Macrophage	Macrophage	CCL3	CCR1	0.0142924142837295	0	CCL3_CCR1	CCL3 - CCR1	CCL	Secreted Signaling	KEGG: hsa04060
37	Monocyte	Macrophage	CCL3	CCR1	0.0092747336659103	0	CCL3_CCR1	CCL3 - CCR1	CCL	Secreted Signaling	KEGG: hsa04060
38	NK/T cells	Macrophage	CCL3	CCR1	0.00176506326374664	0	CCL3_CCR1	CCL3 - CCR1	CCL	Secreted Signaling	KEGG: hsa04060
39	Smooth_muscle_cells	Macrophage	CCL3	CCR1	0.00127241314465195	0	CCL3_CCR1	CCL3 - CCR1	CCL	Secreted Signaling	KEGG: hsa04060
40	Endothelial_cells	Macrophage	CCL3L3	CCR1	0.000653918793853894	0	CCL3L3_CCR1	CCL3L3 - CCR1	CCL	Secreted Signaling	KEGG: hsa04060
41	Hepatocytes_TOP2A_High	Macrophage	CCL3L3	CCR1	0.000336674342393278	0	CCL3L3_CCR1	CCL3L3 - CCR1	CCL	Secreted Signaling	KEGG: hsa04060
42	Hepatocytes_TOP2A_Low	Macrophage	CCL3L3	CCR1	0.000325086930552669	0	CCL3L3_CCR1	CCL3L3 - CCR1	CCL	Secreted Signaling	KEGG: hsa04060
43	Macrophage	Macrophage	CCL3L3	CCR1	0.00983055874882407	0	CCL3L3_CCR1	CCL3L3 - CCR1	CCL	Secreted Signaling	KEGG: hsa04060
44	Monocyte	Macrophage	CCL3L3	CCR1	0.00724097361971025	0	CCL3L3_CCR1	CCL3L3 - CCR1	CCL	Secreted Signaling	KEGG: hsa04060
45	Smooth_muscle_cells	Macrophage	CCL3L3	CCR1	0.000689187860574085	0	CCL3L3_CCR1	CCL3L3 - CCR1	CCL	Secreted Signaling	KEGG: hsa04060
46	Endothelial_cells	Macrophage	CCL14	CCR1	0.00113101514288421	0	CCL14_CCR1	CCL14 - CCR1	CCL	Secreted Signaling	KEGG: hsa04060
47	Hepatocytes_TOP2A_High	Macrophage	CCL15	CCR1	0.00262350704743716	0	CCL15_CCR1	CCL15 - CCR1	CCL	Secreted Signaling	KEGG: hsa04060
48	Hepatocytes_TOP2A_Low	Macrophage	CCL15	CCR1	0.00211470660298568	0	CCL15_CCR1	CCL15 - CCR1	CCL	Secreted Signaling	KEGG: hsa04060
49	Hepatocytes_TOP2A_High	Macrophage	CCL16	CCR1	0.000875517144003085	0	CCL16_CCR1	CCL16 - CCR1	CCL	Secreted Signaling	KEGG: hsa04060
50	Hepatocytes_TOP2A_Low	Macrophage	CCL16	CCR1	0.00107612267217875	0	CCL16_CCR1	CCL16 - CCR1	CCL	Secreted Signaling	KEGG: hsa04060
51	Endothelial_cells	B_cell	CXCL12	CXCR4	0.0223054343911795	0	CXCL12_CXCR4	CXCL12 - CXCR4	CXCL	Secreted Signaling	KEGG: hsa04060
52	Macrophage	B_cell	CXCL12	CXCR4	0.0202305451705099	0	CXCL12_CXCR4	CXCL12 - CXCR4	CXCL	Secreted Signaling	KEGG: hsa04060
53	Endothelial_cells	DC	CXCL12	CXCR4	0.0160715007767999	0	CXCL12_CXCR4	CXCL12 - CXCR4	CXCL	Secreted Signaling	KEGG: hsa04060
54	Macrophage	DC	CXCL12	CXCR4	0.0145678620982081	0	CXCL12_CXCR4	CXCL12 - CXCR4	CXCL	Secreted Signaling	KEGG: hsa04060
55	Endothelial_cells	Endothelial_cells	CXCL12	CXCR4	0.00416337958269246	0	CXCL12_CXCR4	CXCL12 - CXCR4	CXCL	Secreted Signaling	KEGG: hsa04060
56	Macrophage	Endothelial_cells	CXCL12	CXCR4	0.00376958826502199	0	CXCL12_CXCR4	CXCL12 - CXCR4	CXCL	Secreted Signaling	KEGG: hsa04060
57	Endothelial_cells	Hepatocytes_TOP2A_High	CXCL12	CXCR4	0.000657301724577353	0	CXCL12_CXCR4	CXCL12 - CXCR4	CXCL	Secreted Signaling	KEGG: hsa04060
58	Macrophage	Hepatocytes_TOP2A_High	CXCL12	CXCR4	0.000594933030296426	0	CXCL12_CXCR4	CXCL12 - CXCR4	CXCL	Secreted Signaling	KEGG: hsa04060
59	Endothelial_cells	Hepatocytes_TOP2A_Low	CXCL12	CXCR4	0.000975623198877306	0	CXCL12_CXCR4	CXCL12 - CXCR4	CXCL	Secreted Signaling	KEGG: hsa04060
60	Macrophage	Hepatocytes_TOP2A_Low	CXCL12	CXCR4	0.000883076961386876	0	CXCL12_CXCR4	CXCL12 - CXCR4	CXCL	Secreted Signaling	KEGG: hsa04060
61	Endothelial_cells	Macrophage	CXCL12	CXCR4	0.0103383984662609	0	CXCL12_CXCR4	CXCL12 - CXCR4	CXCL	Secreted Signaling	KEGG: hsa04060
62	Macrophage	Macrophage	CXCL12	CXCR4	0.00936603907620923	0	CXCL12_CXCR4	CXCL12 - CXCR4	CXCL	Secreted Signaling	KEGG: hsa04060
63	Endothelial_cells	Monocyte	CXCL12	CXCR4	0.0126867777514594	0	CXCL12_CXCR4	CXCL12 - CXCR4	CXCL	Secreted Signaling	KEGG: hsa04060
64	Macrophage	Monocyte	CXCL12	CXCR4	0.0114961114913384	0	CXCL12_CXCR4	CXCL12 - CXCR4	CXCL	Secreted Signaling	KEGG: hsa04060
65	Endothelial_cells	NK/T cells	CXCL12	CXCR4	0.0206343675624997	0	CXCL12_CXCR4	CXCL12 - CXCR4	CXCL	Secreted Signaling	KEGG: hsa04060
66	Macrophage	NK/T cells	CXCL12	CXCR4	0.018711948756405	0	CXCL12_CXCR4	CXCL12 - CXCR4	CXCL	Secreted Signaling	KEGG: hsa04060
67	Endothelial_cells	Smooth_muscle_cells	CXCL12	CXCR4	0.00168517592606553	0	CXCL12_CXCR4	CXCL12 - CXCR4	CXCL	Secreted Signaling	KEGG: hsa04060
68	Macrophage	Smooth_muscle_cells	CXCL12	CXCR4	0.00152542529223253	0	CXCL12_CXCR4	CXCL12 - CXCR4	CXCL	Secreted Signaling	KEGG: hsa04060
69	B_cell	B_cell	MIF	CD74_CXCR4	0.0881412990811458	0	MIF_CD74_CXCR4	MIF - (CD74+CXCR4)	MIF	Secreted Signaling	PMID: 29637711; PMID: 24760155
70	DC	B_cell	MIF	CD74_CXCR4	0.106401942074575	0	MIF_CD74_CXCR4	MIF - (CD74+CXCR4)	MIF	Secreted Signaling	PMID: 29637711; PMID: 24760155
71	Endothelial_cells	B_cell	MIF	CD74_CXCR4	0.147306176475208	0	MIF_CD74_CXCR4	MIF - (CD74+CXCR4)	MIF	Secreted Signaling	PMID: 29637711; PMID: 24760155
72	Hepatocytes_TOP2A_High	B_cell	MIF	CD74_CXCR4	0.135052105499225	0	MIF_CD74_CXCR4	MIF - (CD74+CXCR4)	MIF	Secreted Signaling	PMID: 29637711; PMID: 24760155
73	Hepatocytes_TOP2A_Low	B_cell	MIF	CD74_CXCR4	0.116803589539176	0	MIF_CD74_CXCR4	MIF - (CD74+CXCR4)	MIF	Secreted Signaling	PMID: 29637711; PMID: 24760155
74	Macrophage	B_cell	MIF	CD74_CXCR4	0.10011631982934	0	MIF_CD74_CXCR4	MIF - (CD74+CXCR4)	MIF	Secreted Signaling	PMID: 29637711; PMID: 24760155
75	Monocyte	B_cell	MIF	CD74_CXCR4	0.10554981939272	0	MIF_CD74_CXCR4	MIF - (CD74+CXCR4)	MIF	Secreted Signaling	PMID: 29637711; PMID: 24760155
76	NK/T cells	B_cell	MIF	CD74_CXCR4	0.106314828048604	0	MIF_CD74_CXCR4	MIF - (CD74+CXCR4)	MIF	Secreted Signaling	PMID: 29637711; PMID: 24760155
77	Smooth_muscle_cells	B_cell	MIF	CD74_CXCR4	0.16474656025998	0	MIF_CD74_CXCR4	MIF - (CD74+CXCR4)	MIF	Secreted Signaling	PMID: 29637711; PMID: 24760155
78	B_cell	DC	MIF	CD74_CXCR4	0.0833083064112923	0	MIF_CD74_CXCR4	MIF - (CD74+CXCR4)	MIF	Secreted Signaling	PMID: 29637711; PMID: 24760155
79	DC	DC	MIF	CD74_CXCR4	0.10067822634222	0	MIF_CD74_CXCR4	MIF - (CD74+CXCR4)	MIF	Secreted Signaling	PMID: 29637711; PMID: 24760155
80	Endothelial_cells	DC	MIF	CD74_CXCR4	0.139726143847338	0	MIF_CD74_CXCR4	MIF - (CD74+CXCR4)	MIF	Secreted Signaling	PMID: 29637711; PMID: 24760155
81	Hepatocytes_TOP2A_High	DC	MIF	CD74_CXCR4	0.128007977084884	0	MIF_CD74_CXCR4	MIF - (CD74+CXCR4)	MIF	Secreted Signaling	PMID: 29637711; PMID: 24760155
82	Hepatocytes_TOP2A_Low	DC	MIF	CD74_CXCR4	0.11058958172535	0	MIF_CD74_CXCR4	MIF - (CD74+CXCR4)	MIF	Secreted Signaling	PMID: 29637711; PMID: 24760155
83	Macrophage	DC	MIF	CD74_CXCR4	0.0946948975222929	0	MIF_CD74_CXCR4	MIF - (CD74+CXCR4)	MIF	Secreted Signaling	PMID: 29637711; PMID: 24760155
84	Monocyte	DC	MIF	CD74_CXCR4	0.099866819358312	0	MIF_CD74_CXCR4	MIF - (CD74+CXCR4)	MIF	Secreted Signaling	PMID: 29637711; PMID: 24760155
85	NK/T cells	DC	MIF	CD74_CXCR4	0.100595270934777	0	MIF_CD74_CXCR4	MIF - (CD74+CXCR4)	MIF	Secreted Signaling	PMID: 29637711; PMID: 24760155
86	Smooth_muscle_cells	DC	MIF	CD74_CXCR4	0.156433729180414	0	MIF_CD74_CXCR4	MIF - (CD74+CXCR4)	MIF	Secreted Signaling	PMID: 29637711; PMID: 24760155
87	Smooth_muscle_cells	Endothelial_cells	MIF	CD74_CXCR4	0.0617023631879934	0	MIF_CD74_CXCR4	MIF - (CD74+CXCR4)	MIF	Secreted Signaling	PMID: 29637711; PMID: 24760155
88	B_cell	Macrophage	MIF	CD74_CXCR4	0.0641025818068387	0	MIF_CD74_CXCR4	MIF - (CD74+CXCR4)	MIF	Secreted Signaling	PMID: 29637711; PMID: 24760155
89	DC	Macrophage	MIF	CD74_CXCR4	0.0778079683683212	0	MIF_CD74_CXCR4	MIF - (CD74+CXCR4)	MIF	Secreted Signaling	PMID: 29637711; PMID: 24760155
90	Endothelial_cells	Macrophage	MIF	CD74_CXCR4	0.109061381737835	0	MIF_CD74_CXCR4	MIF - (CD74+CXCR4)	MIF	Secreted Signaling	PMID: 29637711; PMID: 24760155
91	Hepatocytes_TOP2A_High	Macrophage	MIF	CD74_CXCR4	0.0996171266294261	0	MIF_CD74_CXCR4	MIF - (CD74+CXCR4)	MIF	Secreted Signaling	PMID: 29637711; PMID: 24760155
92	Hepatocytes_TOP2A_Low	Macrophage	MIF	CD74_CXCR4	0.0856823500069889	0	MIF_CD74_CXCR4	MIF - (CD74+CXCR4)	MIF	Secreted Signaling	PMID: 29637711; PMID: 24760155
93	Macrophage	Macrophage	MIF	CD74_CXCR4	0.0730733849308496	0	MIF_CD74_CXCR4	MIF - (CD74+CXCR4)	MIF	Secreted Signaling	PMID: 29637711; PMID: 24760155
94	Monocyte	Macrophage	MIF	CD74_CXCR4	0.0771650667539713	0	MIF_CD74_CXCR4	MIF - (CD74+CXCR4)	MIF	Secreted Signaling	PMID: 29637711; PMID: 24760155
95	NK/T cells	Macrophage	MIF	CD74_CXCR4	0.0777422282657474	0	MIF_CD74_CXCR4	MIF - (CD74+CXCR4)	MIF	Secreted Signaling	PMID: 29637711; PMID: 24760155
96	Smooth_muscle_cells	Macrophage	MIF	CD74_CXCR4	0.122624923123603	0	MIF_CD74_CXCR4	MIF - (CD74+CXCR4)	MIF	Secreted Signaling	PMID: 29637711; PMID: 24760155
97	B_cell	Monocyte	MIF	CD74_CXCR4	0.0676100087570623	0	MIF_CD74_CXCR4	MIF - (CD74+CXCR4)	MIF	Secreted Signaling	PMID: 29637711; PMID: 24760155
98	DC	Monocyte	MIF	CD74_CXCR4	0.0819995937280687	0	MIF_CD74_CXCR4	MIF - (CD74+CXCR4)	MIF	Secreted Signaling	PMID: 29637711; PMID: 24760155
99	Endothelial_cells	Monocyte	MIF	CD74_CXCR4	0.114727212789334	0	MIF_CD74_CXCR4	MIF - (CD74+CXCR4)	MIF	Secreted Signaling	PMID: 29637711; PMID: 24760155
100	Hepatocytes_TOP2A_High	Monocyte	MIF	CD74_CXCR4	0.104850061230681	0	MIF_CD74_CXCR4	MIF - (CD74+CXCR4)	MIF	Secreted Signaling	PMID: 29637711; PMID: 24760155
101	Hepatocytes_TOP2A_Low	Monocyte	MIF	CD74_CXCR4	0.0902566618002235	0	MIF_CD74_CXCR4	MIF - (CD74+CXCR4)	MIF	Secreted Signaling	PMID: 29637711; PMID: 24760155
102	Macrophage	Monocyte	MIF	CD74_CXCR4	0.077031256788945	0	MIF_CD74_CXCR4	MIF - (CD74+CXCR4)	MIF	Secreted Signaling	PMID: 29637711; PMID: 24760155
103	Monocyte	Monocyte	MIF	CD74_CXCR4	0.0813251123554234	0	MIF_CD74_CXCR4	MIF - (CD74+CXCR4)	MIF	Secreted Signaling	PMID: 29637711; PMID: 24760155
104	NK/T cells	Monocyte	MIF	CD74_CXCR4	0.0819306267529535	0	MIF_CD74_CXCR4	MIF - (CD74+CXCR4)	MIF	Secreted Signaling	PMID: 29637711; PMID: 24760155
105	Smooth_muscle_cells	Monocyte	MIF	CD74_CXCR4	0.128893450649246	0	MIF_CD74_CXCR4	MIF - (CD74+CXCR4)	MIF	Secreted Signaling	PMID: 29637711; PMID: 24760155
106	B_cell	NK/T cells	MIF	CD74_CXCR4	0.0650431292372967	0	MIF_CD74_CXCR4	MIF - (CD74+CXCR4)	MIF	Secreted Signaling	PMID: 29637711; PMID: 24760155
107	DC	NK/T cells	MIF	CD74_CXCR4	0.0789326486117984	0	MIF_CD74_CXCR4	MIF - (CD74+CXCR4)	MIF	Secreted Signaling	PMID: 29637711; PMID: 24760155
108	Endothelial_cells	NK/T cells	MIF	CD74_CXCR4	0.110583644799329	0	MIF_CD74_CXCR4	MIF - (CD74+CXCR4)	MIF	Secreted Signaling	PMID: 29637711; PMID: 24760155
109	Hepatocytes_TOP2A_High	NK/T cells	MIF	CD74_CXCR4	0.101022515233831	0	MIF_CD74_CXCR4	MIF - (CD74+CXCR4)	MIF	Secreted Signaling	PMID: 29637711; PMID: 24760155
110	Hepatocytes_TOP2A_Low	NK/T cells	MIF	CD74_CXCR4	0.0869101241955874	0	MIF_CD74_CXCR4	MIF - (CD74+CXCR4)	MIF	Secreted Signaling	PMID: 29637711; PMID: 24760155
111	Macrophage	NK/T cells	MIF	CD74_CXCR4	0.0741351304415609	0	MIF_CD74_CXCR4	MIF - (CD74+CXCR4)	MIF	Secreted Signaling	PMID: 29637711; PMID: 24760155
112	Monocyte	NK/T cells	MIF	CD74_CXCR4	0.078281242969466	0	MIF_CD74_CXCR4	MIF - (CD74+CXCR4)	MIF	Secreted Signaling	PMID: 29637711; PMID: 24760155
113	NK/T cells	NK/T cells	MIF	CD74_CXCR4	0.0788660395298099	0	MIF_CD74_CXCR4	MIF - (CD74+CXCR4)	MIF	Secreted Signaling	PMID: 29637711; PMID: 24760155
114	Smooth_muscle_cells	NK/T cells	MIF	CD74_CXCR4	0.124310089155437	0	MIF_CD74_CXCR4	MIF - (CD74+CXCR4)	MIF	Secreted Signaling	PMID: 29637711; PMID: 24760155
115	B_cell	B_cell	MIF	CD74_CD44	0.0521391270551511	0	MIF_CD74_CD44	MIF - (CD74+CD44)	MIF	Secreted Signaling	PMID: 29637711; PMID: 26175090
116	DC	B_cell	MIF	CD74_CD44	0.0634601177784055	0	MIF_CD74_CD44	MIF - (CD74+CD44)	MIF	Secreted Signaling	PMID: 29637711; PMID: 26175090
117	Endothelial_cells	B_cell	MIF	CD74_CD44	0.0895097601183609	0	MIF_CD74_CD44	MIF - (CD74+CD44)	MIF	Secreted Signaling	PMID: 29637711; PMID: 26175090
118	Hepatocytes_TOP2A_High	B_cell	MIF	CD74_CD44	0.0816035183043761	0	MIF_CD74_CD44	MIF - (CD74+CD44)	MIF	Secreted Signaling	PMID: 29637711; PMID: 26175090
119	Hepatocytes_TOP2A_Low	B_cell	MIF	CD74_CD44	0.0699926645541885	0	MIF_CD74_CD44	MIF - (CD74+CD44)	MIF	Secreted Signaling	PMID: 29637711; PMID: 26175090
120	Macrophage	B_cell	MIF	CD74_CD44	0.059542225225521	0	MIF_CD74_CD44	MIF - (CD74+CD44)	MIF	Secreted Signaling	PMID: 29637711; PMID: 26175090
121	Monocyte	B_cell	MIF	CD74_CD44	0.0629276781167919	0	MIF_CD74_CD44	MIF - (CD74+CD44)	MIF	Secreted Signaling	PMID: 29637711; PMID: 26175090
122	NK/T cells	B_cell	MIF	CD74_CD44	0.0634056667135064	0	MIF_CD74_CD44	MIF - (CD74+CD44)	MIF	Secreted Signaling	PMID: 29637711; PMID: 26175090
123	Smooth_muscle_cells	B_cell	MIF	CD74_CD44	0.100917166327243	0	MIF_CD74_CD44	MIF - (CD74+CD44)	MIF	Secreted Signaling	PMID: 29637711; PMID: 26175090
124	B_cell	DC	MIF	CD74_CD44	0.0373686538032886	0.03	MIF_CD74_CD44	MIF - (CD74+CD44)	MIF	Secreted Signaling	PMID: 29637711; PMID: 26175090
125	DC	DC	MIF	CD74_CD44	0.0456369395365147	0	MIF_CD74_CD44	MIF - (CD74+CD44)	MIF	Secreted Signaling	PMID: 29637711; PMID: 26175090
126	Endothelial_cells	DC	MIF	CD74_CD44	0.0648771916599202	0	MIF_CD74_CD44	MIF - (CD74+CD44)	MIF	Secreted Signaling	PMID: 29637711; PMID: 26175090
127	Hepatocytes_TOP2A_High	DC	MIF	CD74_CD44	0.059005698975052	0	MIF_CD74_CD44	MIF - (CD74+CD44)	MIF	Secreted Signaling	PMID: 29637711; PMID: 26175090
128	Hepatocytes_TOP2A_Low	DC	MIF	CD74_CD44	0.0504335797145633	0	MIF_CD74_CD44	MIF - (CD74+CD44)	MIF	Secreted Signaling	PMID: 29637711; PMID: 26175090
129	Macrophage	DC	MIF	CD74_CD44	0.0427691614587024	0	MIF_CD74_CD44	MIF - (CD74+CD44)	MIF	Secreted Signaling	PMID: 29637711; PMID: 26175090
130	Monocyte	DC	MIF	CD74_CD44	0.0452468143016187	0	MIF_CD74_CD44	MIF - (CD74+CD44)	MIF	Secreted Signaling	PMID: 29637711; PMID: 26175090
131	NK/T cells	DC	MIF	CD74_CD44	0.0455970368377551	0	MIF_CD74_CD44	MIF - (CD74+CD44)	MIF	Secreted Signaling	PMID: 29637711; PMID: 26175090
132	Smooth_muscle_cells	DC	MIF	CD74_CD44	0.0733984138445881	0	MIF_CD74_CD44	MIF - (CD74+CD44)	MIF	Secreted Signaling	PMID: 29637711; PMID: 26175090
133	B_cell	Macrophage	MIF	CD74_CD44	0.0481968295511261	0	MIF_CD74_CD44	MIF - (CD74+CD44)	MIF	Secreted Signaling	PMID: 29637711; PMID: 26175090
134	DC	Macrophage	MIF	CD74_CD44	0.0587148516659946	0	MIF_CD74_CD44	MIF - (CD74+CD44)	MIF	Secreted Signaling	PMID: 29637711; PMID: 26175090
135	Endothelial_cells	Macrophage	MIF	CD74_CD44	0.0829892237000667	0	MIF_CD74_CD44	MIF - (CD74+CD44)	MIF	Secreted Signaling	PMID: 29637711; PMID: 26175090
136	Hepatocytes_TOP2A_High	Macrophage	MIF	CD74_CD44	0.0756111003360494	0	MIF_CD74_CD44	MIF - (CD74+CD44)	MIF	Secreted Signaling	PMID: 29637711; PMID: 26175090
137	Hepatocytes_TOP2A_Low	Macrophage	MIF	CD74_CD44	0.0647927177690711	0	MIF_CD74_CD44	MIF - (CD74+CD44)	MIF	Secreted Signaling	PMID: 29637711; PMID: 26175090
138	Macrophage	Macrophage	MIF	CD74_CD44	0.0550726942389728	0	MIF_CD74_CD44	MIF - (CD74+CD44)	MIF	Secreted Signaling	PMID: 29637711; PMID: 26175090
139	Monocyte	Macrophage	MIF	CD74_CD44	0.0582197504864321	0	MIF_CD74_CD44	MIF - (CD74+CD44)	MIF	Secreted Signaling	PMID: 29637711; PMID: 26175090
140	NK/T cells	Macrophage	MIF	CD74_CD44	0.0586642171673887	0	MIF_CD74_CD44	MIF - (CD74+CD44)	MIF	Secreted Signaling	PMID: 29637711; PMID: 26175090
141	Smooth_muscle_cells	Macrophage	MIF	CD74_CD44	0.0936511068522726	0	MIF_CD74_CD44	MIF - (CD74+CD44)	MIF	Secreted Signaling	PMID: 29637711; PMID: 26175090
142	B_cell	Monocyte	MIF	CD74_CD44	0.0537825812634938	0	MIF_CD74_CD44	MIF - (CD74+CD44)	MIF	Secreted Signaling	PMID: 29637711; PMID: 26175090
143	DC	Monocyte	MIF	CD74_CD44	0.0654357810979039	0	MIF_CD74_CD44	MIF - (CD74+CD44)	MIF	Secreted Signaling	PMID: 29637711; PMID: 26175090
144	Endothelial_cells	Monocyte	MIF	CD74_CD44	0.0922165563579777	0	MIF_CD74_CD44	MIF - (CD74+CD44)	MIF	Secreted Signaling	PMID: 29637711; PMID: 26175090
145	Hepatocytes_TOP2A_High	Monocyte	MIF	CD74_CD44	0.0840933100815071	0	MIF_CD74_CD44	MIF - (CD74+CD44)	MIF	Secreted Signaling	PMID: 29637711; PMID: 26175090
146	Hepatocytes_TOP2A_Low	Monocyte	MIF	CD74_CD44	0.0721560324921611	0	MIF_CD74_CD44	MIF - (CD74+CD44)	MIF	Secreted Signaling	PMID: 29637711; PMID: 26175090
147	Macrophage	Monocyte	MIF	CD74_CD44	0.0614039124318442	0	MIF_CD74_CD44	MIF - (CD74+CD44)	MIF	Secreted Signaling	PMID: 29637711; PMID: 26175090
148	Monocyte	Monocyte	MIF	CD74_CD44	0.0648879138032386	0	MIF_CD74_CD44	MIF - (CD74+CD44)	MIF	Secreted Signaling	PMID: 29637711; PMID: 26175090
149	NK/T cells	Monocyte	MIF	CD74_CD44	0.0653797531838313	0	MIF_CD74_CD44	MIF - (CD74+CD44)	MIF	Secreted Signaling	PMID: 29637711; PMID: 26175090
150	Smooth_muscle_cells	Monocyte	MIF	CD74_CD44	0.103929548835435	0	MIF_CD74_CD44	MIF - (CD74+CD44)	MIF	Secreted Signaling	PMID: 29637711; PMID: 26175090
151	B_cell	NK/T cells	MIF	CD74_CD44	0.0408786591205071	0	MIF_CD74_CD44	MIF - (CD74+CD44)	MIF	Secreted Signaling	PMID: 29637711; PMID: 26175090
152	DC	NK/T cells	MIF	CD74_CD44	0.0498833328404176	0	MIF_CD74_CD44	MIF - (CD74+CD44)	MIF	Secreted Signaling	PMID: 29637711; PMID: 26175090
153	Endothelial_cells	NK/T cells	MIF	CD74_CD44	0.0707810626877783	0	MIF_CD74_CD44	MIF - (CD74+CD44)	MIF	Secreted Signaling	PMID: 29637711; PMID: 26175090
154	Hepatocytes_TOP2A_High	NK/T cells	MIF	CD74_CD44	0.0644120636884438	0	MIF_CD74_CD44	MIF - (CD74+CD44)	MIF	Secreted Signaling	PMID: 29637711; PMID: 26175090
155	Hepatocytes_TOP2A_Low	NK/T cells	MIF	CD74_CD44	0.0551005192317867	0	MIF_CD74_CD44	MIF - (CD74+CD44)	MIF	Secreted Signaling	PMID: 29637711; PMID: 26175090
156	Macrophage	NK/T cells	MIF	CD74_CD44	0.0467617903495714	0	MIF_CD74_CD44	MIF - (CD74+CD44)	MIF	Secreted Signaling	PMID: 29637711; PMID: 26175090
157	Monocyte	NK/T cells	MIF	CD74_CD44	0.0494587887231385	0	MIF_CD74_CD44	MIF - (CD74+CD44)	MIF	Secreted Signaling	PMID: 29637711; PMID: 26175090
158	NK/T cells	NK/T cells	MIF	CD74_CD44	0.0498399112002283	0	MIF_CD74_CD44	MIF - (CD74+CD44)	MIF	Secreted Signaling	PMID: 29637711; PMID: 26175090
159	Smooth_muscle_cells	NK/T cells	MIF	CD74_CD44	0.0800113739121241	0	MIF_CD74_CD44	MIF - (CD74+CD44)	MIF	Secreted Signaling	PMID: 29637711; PMID: 26175090
160	B_cell	DC	IL16	CD4	0.000400583393479891	0	IL16_CD4	IL16 - CD4	IL16	Secreted Signaling	KEGG: hsa04060
161	DC	DC	IL16	CD4	0.000794497532572226	0	IL16_CD4	IL16 - CD4	IL16	Secreted Signaling	KEGG: hsa04060
162	B_cell	Macrophage	IL16	CD4	0.00159462671906865	0	IL16_CD4	IL16 - CD4	IL16	Secreted Signaling	KEGG: hsa04060
163	DC	Macrophage	IL16	CD4	0.00315899406774889	0	IL16_CD4	IL16 - CD4	IL16	Secreted Signaling	KEGG: hsa04060
164	B_cell	Monocyte	IL16	CD4	0.000472918371697355	0	IL16_CD4	IL16 - CD4	IL16	Secreted Signaling	KEGG: hsa04060
165	DC	Monocyte	IL16	CD4	0.0009378964545729	0	IL16_CD4	IL16 - CD4	IL16	Secreted Signaling	KEGG: hsa04060
166	Macrophage	Endothelial_cells	TNF	TNFRSF1A	0.00246579029061369	0	TNF_TNFRSF1A	TNF - TNFRSF1A	TNF	Secreted Signaling	KEGG: hsa04060
167	Macrophage	Hepatocytes_TOP2A_High	TNF	TNFRSF1A	0.000369169048244116	0	TNF_TNFRSF1A	TNF - TNFRSF1A	TNF	Secreted Signaling	KEGG: hsa04060
168	Macrophage	Hepatocytes_TOP2A_Low	TNF	TNFRSF1A	0.000339818620463328	0	TNF_TNFRSF1A	TNF - TNFRSF1A	TNF	Secreted Signaling	KEGG: hsa04060
169	Macrophage	Macrophage	TNF	TNFRSF1A	0.000906810828221319	0	TNF_TNFRSF1A	TNF - TNFRSF1A	TNF	Secreted Signaling	KEGG: hsa04060
170	Macrophage	Smooth_muscle_cells	TNF	TNFRSF1A	0.000994532186108182	0	TNF_TNFRSF1A	TNF - TNFRSF1A	TNF	Secreted Signaling	KEGG: hsa04060
171	Macrophage	DC	TNF	TNFRSF1B	0.000221448079492857	0	TNF_TNFRSF1B	TNF - TNFRSF1B	TNF	Secreted Signaling	KEGG: hsa04060
172	Macrophage	Endothelial_cells	TNF	TNFRSF1B	0.000577358537930896	0	TNF_TNFRSF1B	TNF - TNFRSF1B	TNF	Secreted Signaling	KEGG: hsa04060
173	Macrophage	Macrophage	TNF	TNFRSF1B	0.000957793912638042	0	TNF_TNFRSF1B	TNF - TNFRSF1B	TNF	Secreted Signaling	KEGG: hsa04060
174	Macrophage	Monocyte	TNF	TNFRSF1B	0.00103578386204168	0	TNF_TNFRSF1B	TNF - TNFRSF1B	TNF	Secreted Signaling	KEGG: hsa04060
175	Macrophage	NK/T cells	TNF	TNFRSF1B	0.00118335265659985	0	TNF_TNFRSF1B	TNF - TNFRSF1B	TNF	Secreted Signaling	KEGG: hsa04060
176	Endothelial_cells	Hepatocytes_TOP2A_High	TNFSF12	TNFRSF12A	0.00152292459318135	0	TNFSF12_TNFRSF12A	TNFSF12 - TNFRSF12A	TWEAK	Secreted Signaling	KEGG: hsa04060
177	Endothelial_cells	Hepatocytes_TOP2A_Low	TNFSF12	TNFRSF12A	0.000669837140196815	0	TNFSF12_TNFRSF12A	TNFSF12 - TNFRSF12A	TWEAK	Secreted Signaling	KEGG: hsa04060
178	Endothelial_cells	Smooth_muscle_cells	TNFSF12	TNFRSF12A	0.000935952020786525	0	TNFSF12_TNFRSF12A	TNFSF12 - TNFRSF12A	TWEAK	Secreted Signaling	KEGG: hsa04060
179	DC	B_cell	TNFSF13B	TNFRSF13B	0.00193931860828686	0	TNFSF13B_TNFRSF13B	TNFSF13B - TNFRSF13B	BAFF	Secreted Signaling	KEGG: hsa04060
180	Macrophage	B_cell	TNFSF13B	TNFRSF13B	0.00748329763121966	0	TNFSF13B_TNFRSF13B	TNFSF13B - TNFRSF13B	BAFF	Secreted Signaling	KEGG: hsa04060
181	Monocyte	B_cell	TNFSF13B	TNFRSF13B	0.00623942414267931	0	TNFSF13B_TNFRSF13B	TNFSF13B - TNFRSF13B	BAFF	Secreted Signaling	KEGG: hsa04060
182	DC	B_cell	TNFSF13B	TNFRSF13C	0.00693669263008739	0	TNFSF13B_TNFRSF13C	TNFSF13B - TNFRSF13C	BAFF	Secreted Signaling	KEGG: hsa04060
183	Macrophage	B_cell	TNFSF13B	TNFRSF13C	0.0263890610141538	0	TNFSF13B_TNFRSF13C	TNFSF13B - TNFRSF13C	BAFF	Secreted Signaling	KEGG: hsa04060
184	Monocyte	B_cell	TNFSF13B	TNFRSF13C	0.0220725584864621	0	TNFSF13B_TNFRSF13C	TNFSF13B - TNFRSF13C	BAFF	Secreted Signaling	KEGG: hsa04060
185	Hepatocytes_TOP2A_High	B_cell	SPP1	CD44	0.0338944308413061	0	SPP1_CD44	SPP1 - CD44	SPP1	Secreted Signaling	PMID: 21907263
186	Hepatocytes_TOP2A_Low	B_cell	SPP1	CD44	0.0224959240145936	0	SPP1_CD44	SPP1 - CD44	SPP1	Secreted Signaling	PMID: 21907263
187	Macrophage	B_cell	SPP1	CD44	0.0676646147478894	0	SPP1_CD44	SPP1 - CD44	SPP1	Secreted Signaling	PMID: 21907263
188	Monocyte	B_cell	SPP1	CD44	0.0289631423839255	0	SPP1_CD44	SPP1 - CD44	SPP1	Secreted Signaling	PMID: 21907263
189	NK/T cells	B_cell	SPP1	CD44	0.0147309111416537	0	SPP1_CD44	SPP1 - CD44	SPP1	Secreted Signaling	PMID: 21907263
190	Smooth_muscle_cells	B_cell	SPP1	CD44	0.0160971915494725	0	SPP1_CD44	SPP1 - CD44	SPP1	Secreted Signaling	PMID: 21907263
191	Hepatocytes_TOP2A_High	DC	SPP1	CD44	0.0139545701655346	0	SPP1_CD44	SPP1 - CD44	SPP1	Secreted Signaling	PMID: 21907263
192	Hepatocytes_TOP2A_Low	DC	SPP1	CD44	0.00919788475349322	0	SPP1_CD44	SPP1 - CD44	SPP1	Secreted Signaling	PMID: 21907263
193	Macrophage	DC	SPP1	CD44	0.0284428796832355	0	SPP1_CD44	SPP1 - CD44	SPP1	Secreted Signaling	PMID: 21907263
194	Monocyte	DC	SPP1	CD44	0.011888625383864	0	SPP1_CD44	SPP1 - CD44	SPP1	Secreted Signaling	PMID: 21907263
195	Hepatocytes_TOP2A_High	Macrophage	SPP1	CD44	0.0263972212341012	0	SPP1_CD44	SPP1 - CD44	SPP1	Secreted Signaling	PMID: 21907263
196	Hepatocytes_TOP2A_Low	Macrophage	SPP1	CD44	0.017474380591422	0	SPP1_CD44	SPP1 - CD44	SPP1	Secreted Signaling	PMID: 21907263
197	Macrophage	Macrophage	SPP1	CD44	0.0531083003995382	0	SPP1_CD44	SPP1 - CD44	SPP1	Secreted Signaling	PMID: 21907263
198	Monocyte	Macrophage	SPP1	CD44	0.0225312605194001	0	SPP1_CD44	SPP1 - CD44	SPP1	Secreted Signaling	PMID: 21907263
199	NK/T cells	Macrophage	SPP1	CD44	0.0114224208164604	0	SPP1_CD44	SPP1 - CD44	SPP1	Secreted Signaling	PMID: 21907263
200	Smooth_muscle_cells	Macrophage	SPP1	CD44	0.012485730004963	0	SPP1_CD44	SPP1 - CD44	SPP1	Secreted Signaling	PMID: 21907263
201	Hepatocytes_TOP2A_High	Monocyte	SPP1	CD44	0.0361366775020209	0	SPP1_CD44	SPP1 - CD44	SPP1	Secreted Signaling	PMID: 21907263
202	Hepatocytes_TOP2A_Low	Monocyte	SPP1	CD44	0.0240028501723727	0	SPP1_CD44	SPP1 - CD44	SPP1	Secreted Signaling	PMID: 21907263
203	Macrophage	Monocyte	SPP1	CD44	0.0719744545765959	0	SPP1_CD44	SPP1 - CD44	SPP1	Secreted Signaling	PMID: 21907263
204	Monocyte	Monocyte	SPP1	CD44	0.0308895958417449	0	SPP1_CD44	SPP1 - CD44	SPP1	Secreted Signaling	PMID: 21907263
205	NK/T cells	Monocyte	SPP1	CD44	0.0157260534375988	0	SPP1_CD44	SPP1 - CD44	SPP1	Secreted Signaling	PMID: 21907263
206	Smooth_muscle_cells	Monocyte	SPP1	CD44	0.0171830228275538	0	SPP1_CD44	SPP1 - CD44	SPP1	Secreted Signaling	PMID: 21907263
207	Hepatocytes_TOP2A_High	NK/T cells	SPP1	CD44	0.0361930024129302	0	SPP1_CD44	SPP1 - CD44	SPP1	Secreted Signaling	PMID: 21907263
208	Hepatocytes_TOP2A_Low	NK/T cells	SPP1	CD44	0.0240407342505613	0	SPP1_CD44	SPP1 - CD44	SPP1	Secreted Signaling	PMID: 21907263
209	Macrophage	NK/T cells	SPP1	CD44	0.0720824610993916	0	SPP1_CD44	SPP1 - CD44	SPP1	Secreted Signaling	PMID: 21907263
210	Monocyte	NK/T cells	SPP1	CD44	0.0309380048300156	0	SPP1_CD44	SPP1 - CD44	SPP1	Secreted Signaling	PMID: 21907263
211	NK/T cells	NK/T cells	SPP1	CD44	0.0157510849396149	0	SPP1_CD44	SPP1 - CD44	SPP1	Secreted Signaling	PMID: 21907263
212	Smooth_muscle_cells	NK/T cells	SPP1	CD44	0.0172103328695022	0	SPP1_CD44	SPP1 - CD44	SPP1	Secreted Signaling	PMID: 21907263
213	Hepatocytes_TOP2A_High	Smooth_muscle_cells	SPP1	CD44	0.00859308398228198	0	SPP1_CD44	SPP1 - CD44	SPP1	Secreted Signaling	PMID: 21907263
214	Macrophage	Smooth_muscle_cells	SPP1	CD44	0.0176142777431892	0	SPP1_CD44	SPP1 - CD44	SPP1	Secreted Signaling	PMID: 21907263
215	Monocyte	Smooth_muscle_cells	SPP1	CD44	0.00731500745243123	0	SPP1_CD44	SPP1 - CD44	SPP1	Secreted Signaling	PMID: 21907263
216	Hepatocytes_TOP2A_High	Endothelial_cells	SPP1	ITGAV_ITGB1	0.0107287588046176	0	SPP1_ITGAV_ITGB1	SPP1 - (ITGAV+ITGB1)	SPP1	Secreted Signaling	PMID: 21907263
217	Hepatocytes_TOP2A_Low	Endothelial_cells	SPP1	ITGAV_ITGB1	0.00706377653819747	0	SPP1_ITGAV_ITGB1	SPP1 - (ITGAV+ITGB1)	SPP1	Secreted Signaling	PMID: 21907263
218	Macrophage	Endothelial_cells	SPP1	ITGAV_ITGB1	0.021942404363621	0	SPP1_ITGAV_ITGB1	SPP1 - (ITGAV+ITGB1)	SPP1	Secreted Signaling	PMID: 21907263
219	Monocyte	Endothelial_cells	SPP1	ITGAV_ITGB1	0.00913596376348786	0	SPP1_ITGAV_ITGB1	SPP1 - (ITGAV+ITGB1)	SPP1	Secreted Signaling	PMID: 21907263
220	NK/T cells	Endothelial_cells	SPP1	ITGAV_ITGB1	0.0046004733571135	0	SPP1_ITGAV_ITGB1	SPP1 - (ITGAV+ITGB1)	SPP1	Secreted Signaling	PMID: 21907263
221	Smooth_muscle_cells	Endothelial_cells	SPP1	ITGAV_ITGB1	0.00503196230901882	0	SPP1_ITGAV_ITGB1	SPP1 - (ITGAV+ITGB1)	SPP1	Secreted Signaling	PMID: 21907263
222	Hepatocytes_TOP2A_High	Hepatocytes_TOP2A_High	SPP1	ITGAV_ITGB1	0.00614368553743022	0	SPP1_ITGAV_ITGB1	SPP1 - (ITGAV+ITGB1)	SPP1	Secreted Signaling	PMID: 21907263
223	Hepatocytes_TOP2A_Low	Hepatocytes_TOP2A_High	SPP1	ITGAV_ITGB1	0.00403858650150706	0	SPP1_ITGAV_ITGB1	SPP1 - (ITGAV+ITGB1)	SPP1	Secreted Signaling	PMID: 21907263
224	Macrophage	Hepatocytes_TOP2A_High	SPP1	ITGAV_ITGB1	0.0126261999363288	0	SPP1_ITGAV_ITGB1	SPP1 - (ITGAV+ITGB1)	SPP1	Secreted Signaling	PMID: 21907263
225	Monocyte	Hepatocytes_TOP2A_High	SPP1	ITGAV_ITGB1	0.00522799467492045	0	SPP1_ITGAV_ITGB1	SPP1 - (ITGAV+ITGB1)	SPP1	Secreted Signaling	PMID: 21907263
226	NK/T cells	Hepatocytes_TOP2A_High	SPP1	ITGAV_ITGB1	0.00262744589779477	0	SPP1_ITGAV_ITGB1	SPP1 - (ITGAV+ITGB1)	SPP1	Secreted Signaling	PMID: 21907263
227	Smooth_muscle_cells	Hepatocytes_TOP2A_High	SPP1	ITGAV_ITGB1	0.00287441445972465	0	SPP1_ITGAV_ITGB1	SPP1 - (ITGAV+ITGB1)	SPP1	Secreted Signaling	PMID: 21907263
228	Hepatocytes_TOP2A_High	Smooth_muscle_cells	SPP1	ITGAV_ITGB1	0.0198325852565457	0	SPP1_ITGAV_ITGB1	SPP1 - (ITGAV+ITGB1)	SPP1	Secreted Signaling	PMID: 21907263
229	Hepatocytes_TOP2A_Low	Smooth_muscle_cells	SPP1	ITGAV_ITGB1	0.0130988814044472	0	SPP1_ITGAV_ITGB1	SPP1 - (ITGAV+ITGB1)	SPP1	Secreted Signaling	PMID: 21907263
230	Macrophage	Smooth_muscle_cells	SPP1	ITGAV_ITGB1	0.04017508236255	0	SPP1_ITGAV_ITGB1	SPP1 - (ITGAV+ITGB1)	SPP1	Secreted Signaling	PMID: 21907263
231	Monocyte	Smooth_muscle_cells	SPP1	ITGAV_ITGB1	0.0169113376833672	0	SPP1_ITGAV_ITGB1	SPP1 - (ITGAV+ITGB1)	SPP1	Secreted Signaling	PMID: 21907263
232	NK/T cells	Smooth_muscle_cells	SPP1	ITGAV_ITGB1	0.00854911709201984	0	SPP1_ITGAV_ITGB1	SPP1 - (ITGAV+ITGB1)	SPP1	Secreted Signaling	PMID: 21907263
233	Smooth_muscle_cells	Smooth_muscle_cells	SPP1	ITGAV_ITGB1	0.00934748053869852	0	SPP1_ITGAV_ITGB1	SPP1 - (ITGAV+ITGB1)	SPP1	Secreted Signaling	PMID: 21907263
234	Hepatocytes_TOP2A_High	DC	SPP1	ITGA4_ITGB1	0.00872235147552252	0	SPP1_ITGA4_ITGB1	SPP1 - (ITGA4+ITGB1)	SPP1	Secreted Signaling	PMID: 21907263
235	Hepatocytes_TOP2A_Low	DC	SPP1	ITGA4_ITGB1	0.00573878910750935	0	SPP1_ITGA4_ITGB1	SPP1 - (ITGA4+ITGB1)	SPP1	Secreted Signaling	PMID: 21907263
236	Macrophage	DC	SPP1	ITGA4_ITGB1	0.0178768058245883	0	SPP1_ITGA4_ITGB1	SPP1 - (ITGA4+ITGB1)	SPP1	Secreted Signaling	PMID: 21907263
237	Monocyte	DC	SPP1	ITGA4_ITGB1	0.00742519257981402	0	SPP1_ITGA4_ITGB1	SPP1 - (ITGA4+ITGB1)	SPP1	Secreted Signaling	PMID: 21907263
238	NK/T cells	DC	SPP1	ITGA4_ITGB1	0.00373580144090199	0	SPP1_ITGA4_ITGB1	SPP1 - (ITGA4+ITGB1)	SPP1	Secreted Signaling	PMID: 21907263
239	Smooth_muscle_cells	DC	SPP1	ITGA4_ITGB1	0.00408652377681081	0	SPP1_ITGA4_ITGB1	SPP1 - (ITGA4+ITGB1)	SPP1	Secreted Signaling	PMID: 21907263
240	Hepatocytes_TOP2A_High	Endothelial_cells	SPP1	ITGA5_ITGB1	0.0304649423306747	0	SPP1_ITGA5_ITGB1	SPP1 - (ITGA5+ITGB1)	SPP1	Secreted Signaling	PMID: 21907263
241	Hepatocytes_TOP2A_Low	Endothelial_cells	SPP1	ITGA5_ITGB1	0.0201956440780088	0	SPP1_ITGA5_ITGB1	SPP1 - (ITGA5+ITGB1)	SPP1	Secreted Signaling	PMID: 21907263
242	Macrophage	Endothelial_cells	SPP1	ITGA5_ITGB1	0.0610340742027628	0	SPP1_ITGA5_ITGB1	SPP1 - (ITGA5+ITGB1)	SPP1	Secreted Signaling	PMID: 21907263
243	Monocyte	Endothelial_cells	SPP1	ITGA5_ITGB1	0.0260191710482815	0	SPP1_ITGA5_ITGB1	SPP1 - (ITGA5+ITGB1)	SPP1	Secreted Signaling	PMID: 21907263
244	NK/T cells	Endothelial_cells	SPP1	ITGA5_ITGB1	0.0132138952706073	0	SPP1_ITGA5_ITGB1	SPP1 - (ITGA5+ITGB1)	SPP1	Secreted Signaling	PMID: 21907263
245	Smooth_muscle_cells	Endothelial_cells	SPP1	ITGA5_ITGB1	0.0144415359844765	0	SPP1_ITGA5_ITGB1	SPP1 - (ITGA5+ITGB1)	SPP1	Secreted Signaling	PMID: 21907263
246	Hepatocytes_TOP2A_High	Hepatocytes_TOP2A_High	SPP1	ITGA5_ITGB1	0.00641493931997959	0	SPP1_ITGA5_ITGB1	SPP1 - (ITGA5+ITGB1)	SPP1	Secreted Signaling	PMID: 21907263
247	Hepatocytes_TOP2A_Low	Hepatocytes_TOP2A_High	SPP1	ITGA5_ITGB1	0.00421729110566278	0	SPP1_ITGA5_ITGB1	SPP1 - (ITGA5+ITGB1)	SPP1	Secreted Signaling	PMID: 21907263
248	Macrophage	Hepatocytes_TOP2A_High	SPP1	ITGA5_ITGB1	0.0131798717730077	0	SPP1_ITGA5_ITGB1	SPP1 - (ITGA5+ITGB1)	SPP1	Secreted Signaling	PMID: 21907263
249	Monocyte	Hepatocytes_TOP2A_High	SPP1	ITGA5_ITGB1	0.00545904127486231	0	SPP1_ITGA5_ITGB1	SPP1 - (ITGA5+ITGB1)	SPP1	Secreted Signaling	PMID: 21907263
250	NK/T cells	Hepatocytes_TOP2A_High	SPP1	ITGA5_ITGB1	0.00274388055363096	0	SPP1_ITGA5_ITGB1	SPP1 - (ITGA5+ITGB1)	SPP1	Secreted Signaling	PMID: 21907263
251	Smooth_muscle_cells	Hepatocytes_TOP2A_High	SPP1	ITGA5_ITGB1	0.00300176053125098	0	SPP1_ITGA5_ITGB1	SPP1 - (ITGA5+ITGB1)	SPP1	Secreted Signaling	PMID: 21907263
252	DC	Endothelial_cells	NAMPT	INSR	0.036561692397671	0	NAMPT_INSR	NAMPT - INSR	VISFATIN	Secreted Signaling	PMID: 28490838
253	Endothelial_cells	Endothelial_cells	NAMPT	INSR	0.0247037051707787	0	NAMPT_INSR	NAMPT - INSR	VISFATIN	Secreted Signaling	PMID: 28490838
254	Hepatocytes_TOP2A_High	Endothelial_cells	NAMPT	INSR	0.0289895706024324	0	NAMPT_INSR	NAMPT - INSR	VISFATIN	Secreted Signaling	PMID: 28490838
255	Hepatocytes_TOP2A_Low	Endothelial_cells	NAMPT	INSR	0.0251382085814145	0	NAMPT_INSR	NAMPT - INSR	VISFATIN	Secreted Signaling	PMID: 28490838
256	Macrophage	Endothelial_cells	NAMPT	INSR	0.0601488865925099	0	NAMPT_INSR	NAMPT - INSR	VISFATIN	Secreted Signaling	PMID: 28490838
257	Monocyte	Endothelial_cells	NAMPT	INSR	0.0721331002203075	0	NAMPT_INSR	NAMPT - INSR	VISFATIN	Secreted Signaling	PMID: 28490838
258	NK/T cells	Endothelial_cells	NAMPT	INSR	0.0148016194727305	0	NAMPT_INSR	NAMPT - INSR	VISFATIN	Secreted Signaling	PMID: 28490838
259	Smooth_muscle_cells	Endothelial_cells	NAMPT	INSR	0.00928610221441739	0	NAMPT_INSR	NAMPT - INSR	VISFATIN	Secreted Signaling	PMID: 28490838
260	DC	Hepatocytes_TOP2A_High	NAMPT	INSR	0.00202987999661742	0	NAMPT_INSR	NAMPT - INSR	VISFATIN	Secreted Signaling	PMID: 28490838
261	Endothelial_cells	Hepatocytes_TOP2A_High	NAMPT	INSR	0.00135577231931426	0.03	NAMPT_INSR	NAMPT - INSR	VISFATIN	Secreted Signaling	PMID: 28490838
262	Hepatocytes_TOP2A_High	Hepatocytes_TOP2A_High	NAMPT	INSR	0.0015976216614206	0.01	NAMPT_INSR	NAMPT - INSR	VISFATIN	Secreted Signaling	PMID: 28490838
263	Hepatocytes_TOP2A_Low	Hepatocytes_TOP2A_High	NAMPT	INSR	0.00138019959201483	0.04	NAMPT_INSR	NAMPT - INSR	VISFATIN	Secreted Signaling	PMID: 28490838
264	Macrophage	Hepatocytes_TOP2A_High	NAMPT	INSR	0.0034184703042956	0	NAMPT_INSR	NAMPT - INSR	VISFATIN	Secreted Signaling	PMID: 28490838
265	Monocyte	Hepatocytes_TOP2A_High	NAMPT	INSR	0.00414947847966771	0	NAMPT_INSR	NAMPT - INSR	VISFATIN	Secreted Signaling	PMID: 28490838
266	DC	Hepatocytes_TOP2A_Low	NAMPT	INSR	0.0022977041178199	0	NAMPT_INSR	NAMPT - INSR	VISFATIN	Secreted Signaling	PMID: 28490838
267	Endothelial_cells	Hepatocytes_TOP2A_Low	NAMPT	INSR	0.00153479087649925	0	NAMPT_INSR	NAMPT - INSR	VISFATIN	Secreted Signaling	PMID: 28490838
268	Hepatocytes_TOP2A_High	Hepatocytes_TOP2A_Low	NAMPT	INSR	0.00180851659835998	0	NAMPT_INSR	NAMPT - INSR	VISFATIN	Secreted Signaling	PMID: 28490838
269	Hepatocytes_TOP2A_Low	Hepatocytes_TOP2A_Low	NAMPT	INSR	0.00156243852280866	0	NAMPT_INSR	NAMPT - INSR	VISFATIN	Secreted Signaling	PMID: 28490838
270	Macrophage	Hepatocytes_TOP2A_Low	NAMPT	INSR	0.00386879598004777	0	NAMPT_INSR	NAMPT - INSR	VISFATIN	Secreted Signaling	PMID: 28490838
271	Monocyte	Hepatocytes_TOP2A_Low	NAMPT	INSR	0.00469564839286681	0	NAMPT_INSR	NAMPT - INSR	VISFATIN	Secreted Signaling	PMID: 28490838
272	NK/T cells	Hepatocytes_TOP2A_Low	NAMPT	INSR	0.000910920568523712	0	NAMPT_INSR	NAMPT - INSR	VISFATIN	Secreted Signaling	PMID: 28490838
273	Smooth_muscle_cells	Hepatocytes_TOP2A_Low	NAMPT	INSR	0.000568498063316338	0	NAMPT_INSR	NAMPT - INSR	VISFATIN	Secreted Signaling	PMID: 28490838
274	DC	Smooth_muscle_cells	NAMPT	INSR	0.00407097718565717	0	NAMPT_INSR	NAMPT - INSR	VISFATIN	Secreted Signaling	PMID: 28490838
275	Endothelial_cells	Smooth_muscle_cells	NAMPT	INSR	0.00272088474324766	0	NAMPT_INSR	NAMPT - INSR	VISFATIN	Secreted Signaling	PMID: 28490838
276	Hepatocytes_TOP2A_High	Smooth_muscle_cells	NAMPT	INSR	0.00320546792053947	0	NAMPT_INSR	NAMPT - INSR	VISFATIN	Secreted Signaling	PMID: 28490838
277	Hepatocytes_TOP2A_Low	Smooth_muscle_cells	NAMPT	INSR	0.00276983935331152	0	NAMPT_INSR	NAMPT - INSR	VISFATIN	Secreted Signaling	PMID: 28490838
278	Macrophage	Smooth_muscle_cells	NAMPT	INSR	0.00684625258526893	0	NAMPT_INSR	NAMPT - INSR	VISFATIN	Secreted Signaling	PMID: 28490838
279	Monocyte	Smooth_muscle_cells	NAMPT	INSR	0.00830415239729661	0	NAMPT_INSR	NAMPT - INSR	VISFATIN	Secreted Signaling	PMID: 28490838
280	NK/T cells	Smooth_muscle_cells	NAMPT	INSR	0.00161566457958227	0	NAMPT_INSR	NAMPT - INSR	VISFATIN	Secreted Signaling	PMID: 28490838
281	DC	Endothelial_cells	NAMPT	ITGA5_ITGB1	0.024899348156957	0	NAMPT_ITGA5_ITGB1	NAMPT - (ITGA5+ITGB1)	VISFATIN	Secreted Signaling	PMID: 28490838
282	Endothelial_cells	Endothelial_cells	NAMPT	ITGA5_ITGB1	0.0167579964961893	0	NAMPT_ITGA5_ITGB1	NAMPT - (ITGA5+ITGB1)	VISFATIN	Secreted Signaling	PMID: 28490838
283	Hepatocytes_TOP2A_High	Endothelial_cells	NAMPT	ITGA5_ITGB1	0.0196931894477993	0	NAMPT_ITGA5_ITGB1	NAMPT - (ITGA5+ITGB1)	VISFATIN	Secreted Signaling	PMID: 28490838
284	Hepatocytes_TOP2A_Low	Endothelial_cells	NAMPT	ITGA5_ITGB1	0.017055189974144	0	NAMPT_ITGA5_ITGB1	NAMPT - (ITGA5+ITGB1)	VISFATIN	Secreted Signaling	PMID: 28490838
285	Macrophage	Endothelial_cells	NAMPT	ITGA5_ITGB1	0.0412851746891388	0	NAMPT_ITGA5_ITGB1	NAMPT - (ITGA5+ITGB1)	VISFATIN	Secreted Signaling	PMID: 28490838
286	Monocyte	Endothelial_cells	NAMPT	ITGA5_ITGB1	0.0497097240471458	0	NAMPT_ITGA5_ITGB1	NAMPT - (ITGA5+ITGB1)	VISFATIN	Secreted Signaling	PMID: 28490838
287	NK/T cells	Endothelial_cells	NAMPT	ITGA5_ITGB1	0.0100081388247622	0	NAMPT_ITGA5_ITGB1	NAMPT - (ITGA5+ITGB1)	VISFATIN	Secreted Signaling	PMID: 28490838
288	Smooth_muscle_cells	Endothelial_cells	NAMPT	ITGA5_ITGB1	0.00626744989848733	0	NAMPT_ITGA5_ITGB1	NAMPT - (ITGA5+ITGB1)	VISFATIN	Secreted Signaling	PMID: 28490838
289	DC	Hepatocytes_TOP2A_High	NAMPT	ITGA5_ITGB1	0.00521935114837209	0	NAMPT_ITGA5_ITGB1	NAMPT - (ITGA5+ITGB1)	VISFATIN	Secreted Signaling	PMID: 28490838
290	Endothelial_cells	Hepatocytes_TOP2A_High	NAMPT	ITGA5_ITGB1	0.00348974826478329	0	NAMPT_ITGA5_ITGB1	NAMPT - (ITGA5+ITGB1)	VISFATIN	Secreted Signaling	PMID: 28490838
291	Hepatocytes_TOP2A_High	Hepatocytes_TOP2A_High	NAMPT	ITGA5_ITGB1	0.00411069980272284	0	NAMPT_ITGA5_ITGB1	NAMPT - (ITGA5+ITGB1)	VISFATIN	Secreted Signaling	PMID: 28490838
292	Hepatocytes_TOP2A_Low	Hepatocytes_TOP2A_High	NAMPT	ITGA5_ITGB1	0.0035524871175048	0	NAMPT_ITGA5_ITGB1	NAMPT - (ITGA5+ITGB1)	VISFATIN	Secreted Signaling	PMID: 28490838
293	Macrophage	Hepatocytes_TOP2A_High	NAMPT	ITGA5_ITGB1	0.0087706042104035	0	NAMPT_ITGA5_ITGB1	NAMPT - (ITGA5+ITGB1)	VISFATIN	Secreted Signaling	PMID: 28490838
294	Monocyte	Hepatocytes_TOP2A_High	NAMPT	ITGA5_ITGB1	0.0106339042961256	0	NAMPT_ITGA5_ITGB1	NAMPT - (ITGA5+ITGB1)	VISFATIN	Secreted Signaling	PMID: 28490838
295	NK/T cells	Hepatocytes_TOP2A_High	NAMPT	ITGA5_ITGB1	0.00207286579428121	0	NAMPT_ITGA5_ITGB1	NAMPT - (ITGA5+ITGB1)	VISFATIN	Secreted Signaling	PMID: 28490838
296	Smooth_muscle_cells	Hepatocytes_TOP2A_High	NAMPT	ITGA5_ITGB1	0.00129422437133106	0	NAMPT_ITGA5_ITGB1	NAMPT - (ITGA5+ITGB1)	VISFATIN	Secreted Signaling	PMID: 28490838
297	Endothelial_cells	Endothelial_cells	ANGPTL4	ITGA5_ITGB1	0.00325915583785809	0	ANGPTL4_ITGA5_ITGB1	ANGPTL4 - (ITGA5+ITGB1)	ANGPTL	Secreted Signaling	PMID: 30049845
298	Hepatocytes_TOP2A_High	Endothelial_cells	ANGPTL4	ITGA5_ITGB1	0.00219716716457037	0	ANGPTL4_ITGA5_ITGB1	ANGPTL4 - (ITGA5+ITGB1)	ANGPTL	Secreted Signaling	PMID: 30049845
299	Hepatocytes_TOP2A_Low	Endothelial_cells	ANGPTL4	ITGA5_ITGB1	0.00274180297410065	0	ANGPTL4_ITGA5_ITGB1	ANGPTL4 - (ITGA5+ITGB1)	ANGPTL	Secreted Signaling	PMID: 30049845
300	Smooth_muscle_cells	Endothelial_cells	ANGPTL4	ITGA5_ITGB1	0.00713857345276269	0	ANGPTL4_ITGA5_ITGB1	ANGPTL4 - (ITGA5+ITGB1)	ANGPTL	Secreted Signaling	PMID: 30049845
301	Endothelial_cells	Hepatocytes_TOP2A_High	ANGPTL4	ITGA5_ITGB1	0.000671400785743752	0	ANGPTL4_ITGA5_ITGB1	ANGPTL4 - (ITGA5+ITGB1)	ANGPTL	Secreted Signaling	PMID: 30049845
302	Hepatocytes_TOP2A_High	Hepatocytes_TOP2A_High	ANGPTL4	ITGA5_ITGB1	0.000452243749310093	0	ANGPTL4_ITGA5_ITGB1	ANGPTL4 - (ITGA5+ITGB1)	ANGPTL	Secreted Signaling	PMID: 30049845
303	Hepatocytes_TOP2A_Low	Hepatocytes_TOP2A_High	ANGPTL4	ITGA5_ITGB1	0.000564591086316564	0	ANGPTL4_ITGA5_ITGB1	ANGPTL4 - (ITGA5+ITGB1)	ANGPTL	Secreted Signaling	PMID: 30049845
304	Smooth_muscle_cells	Hepatocytes_TOP2A_High	ANGPTL4	ITGA5_ITGB1	0.00147513692518052	0	ANGPTL4_ITGA5_ITGB1	ANGPTL4 - (ITGA5+ITGB1)	ANGPTL	Secreted Signaling	PMID: 30049845
305	Endothelial_cells	Endothelial_cells	ANGPTL4	CDH5	0.00337310570747565	0	ANGPTL4_CDH5	ANGPTL4 - CDH5	ANGPTL	Secreted Signaling	PMID: 30049845
306	Hepatocytes_TOP2A_High	Endothelial_cells	ANGPTL4	CDH5	0.00227407143595477	0	ANGPTL4_CDH5	ANGPTL4 - CDH5	ANGPTL	Secreted Signaling	PMID: 30049845
307	Hepatocytes_TOP2A_Low	Endothelial_cells	ANGPTL4	CDH5	0.00283771613193725	0	ANGPTL4_CDH5	ANGPTL4 - CDH5	ANGPTL	Secreted Signaling	PMID: 30049845
308	Smooth_muscle_cells	Endothelial_cells	ANGPTL4	CDH5	0.00738715416438972	0	ANGPTL4_CDH5	ANGPTL4 - CDH5	ANGPTL	Secreted Signaling	PMID: 30049845
309	Endothelial_cells	Smooth_muscle_cells	ANGPTL4	CDH11	0.000387280092740454	0	ANGPTL4_CDH11	ANGPTL4 - CDH11	ANGPTL	Secreted Signaling	PMID: 30049845
310	Hepatocytes_TOP2A_High	Smooth_muscle_cells	ANGPTL4	CDH11	0.000260840845275917	0	ANGPTL4_CDH11	ANGPTL4 - CDH11	ANGPTL	Secreted Signaling	PMID: 30049845
311	Hepatocytes_TOP2A_Low	Smooth_muscle_cells	ANGPTL4	CDH11	0.000325654964472918	0	ANGPTL4_CDH11	ANGPTL4 - CDH11	ANGPTL	Secreted Signaling	PMID: 30049845
312	Smooth_muscle_cells	Smooth_muscle_cells	ANGPTL4	CDH11	0.000851184095507283	0	ANGPTL4_CDH11	ANGPTL4 - CDH11	ANGPTL	Secreted Signaling	PMID: 30049845
313	Endothelial_cells	Hepatocytes_TOP2A_High	ANGPTL4	SDC1	0.00160597893915685	0	ANGPTL4_SDC1	ANGPTL4 - SDC1	ANGPTL	Secreted Signaling	PMID: 29017031
314	Hepatocytes_TOP2A_High	Hepatocytes_TOP2A_High	ANGPTL4	SDC1	0.00108208946724583	0	ANGPTL4_SDC1	ANGPTL4 - SDC1	ANGPTL	Secreted Signaling	PMID: 29017031
315	Hepatocytes_TOP2A_Low	Hepatocytes_TOP2A_High	ANGPTL4	SDC1	0.00135069295805002	0	ANGPTL4_SDC1	ANGPTL4 - SDC1	ANGPTL	Secreted Signaling	PMID: 29017031
316	Smooth_muscle_cells	Hepatocytes_TOP2A_High	ANGPTL4	SDC1	0.00352455585497896	0	ANGPTL4_SDC1	ANGPTL4 - SDC1	ANGPTL	Secreted Signaling	PMID: 29017031
317	Endothelial_cells	Hepatocytes_TOP2A_Low	ANGPTL4	SDC1	0.00139540168217715	0	ANGPTL4_SDC1	ANGPTL4 - SDC1	ANGPTL	Secreted Signaling	PMID: 29017031
318	Hepatocytes_TOP2A_High	Hepatocytes_TOP2A_Low	ANGPTL4	SDC1	0.000940140336636968	0	ANGPTL4_SDC1	ANGPTL4 - SDC1	ANGPTL	Secreted Signaling	PMID: 29017031
319	Hepatocytes_TOP2A_Low	Hepatocytes_TOP2A_Low	ANGPTL4	SDC1	0.00117354965954539	0	ANGPTL4_SDC1	ANGPTL4 - SDC1	ANGPTL	Secreted Signaling	PMID: 29017031
320	Smooth_muscle_cells	Hepatocytes_TOP2A_Low	ANGPTL4	SDC1	0.00306318507236381	0	ANGPTL4_SDC1	ANGPTL4 - SDC1	ANGPTL	Secreted Signaling	PMID: 29017031
321	Endothelial_cells	DC	ANGPTL4	SDC2	0.000743408189278391	0	ANGPTL4_SDC2	ANGPTL4 - SDC2	ANGPTL	Secreted Signaling	PMID: 29017031
322	Hepatocytes_TOP2A_High	DC	ANGPTL4	SDC2	0.000500758446622138	0	ANGPTL4_SDC2	ANGPTL4 - SDC2	ANGPTL	Secreted Signaling	PMID: 29017031
323	Hepatocytes_TOP2A_Low	DC	ANGPTL4	SDC2	0.000625150368291397	0	ANGPTL4_SDC2	ANGPTL4 - SDC2	ANGPTL	Secreted Signaling	PMID: 29017031
324	Smooth_muscle_cells	DC	ANGPTL4	SDC2	0.00163320375649704	0	ANGPTL4_SDC2	ANGPTL4 - SDC2	ANGPTL	Secreted Signaling	PMID: 29017031
325	Endothelial_cells	Endothelial_cells	ANGPTL4	SDC2	0.000155883452464171	0	ANGPTL4_SDC2	ANGPTL4 - SDC2	ANGPTL	Secreted Signaling	PMID: 29017031
326	Hepatocytes_TOP2A_High	Endothelial_cells	ANGPTL4	SDC2	0.000104982671545991	0	ANGPTL4_SDC2	ANGPTL4 - SDC2	ANGPTL	Secreted Signaling	PMID: 29017031
327	Hepatocytes_TOP2A_Low	Endothelial_cells	ANGPTL4	SDC2	0.000131073998654408	0	ANGPTL4_SDC2	ANGPTL4 - SDC2	ANGPTL	Secreted Signaling	PMID: 29017031
328	Smooth_muscle_cells	Endothelial_cells	ANGPTL4	SDC2	0.000342703691829986	0	ANGPTL4_SDC2	ANGPTL4 - SDC2	ANGPTL	Secreted Signaling	PMID: 29017031
329	Endothelial_cells	Hepatocytes_TOP2A_High	ANGPTL4	SDC2	0.00388870566042364	0	ANGPTL4_SDC2	ANGPTL4 - SDC2	ANGPTL	Secreted Signaling	PMID: 29017031
330	Hepatocytes_TOP2A_High	Hepatocytes_TOP2A_High	ANGPTL4	SDC2	0.00262211923269731	0	ANGPTL4_SDC2	ANGPTL4 - SDC2	ANGPTL	Secreted Signaling	PMID: 29017031
331	Hepatocytes_TOP2A_Low	Hepatocytes_TOP2A_High	ANGPTL4	SDC2	0.00327174715357836	0	ANGPTL4_SDC2	ANGPTL4 - SDC2	ANGPTL	Secreted Signaling	PMID: 29017031
332	Smooth_muscle_cells	Hepatocytes_TOP2A_High	ANGPTL4	SDC2	0.00851108627281085	0	ANGPTL4_SDC2	ANGPTL4 - SDC2	ANGPTL	Secreted Signaling	PMID: 29017031
333	Endothelial_cells	Hepatocytes_TOP2A_Low	ANGPTL4	SDC2	0.00327120234941324	0	ANGPTL4_SDC2	ANGPTL4 - SDC2	ANGPTL	Secreted Signaling	PMID: 29017031
334	Hepatocytes_TOP2A_High	Hepatocytes_TOP2A_Low	ANGPTL4	SDC2	0.00220529703197822	0	ANGPTL4_SDC2	ANGPTL4 - SDC2	ANGPTL	Secreted Signaling	PMID: 29017031
335	Hepatocytes_TOP2A_Low	Hepatocytes_TOP2A_Low	ANGPTL4	SDC2	0.00275194252245538	0	ANGPTL4_SDC2	ANGPTL4 - SDC2	ANGPTL	Secreted Signaling	PMID: 29017031
336	Smooth_muscle_cells	Hepatocytes_TOP2A_Low	ANGPTL4	SDC2	0.00716485601749858	0	ANGPTL4_SDC2	ANGPTL4 - SDC2	ANGPTL	Secreted Signaling	PMID: 29017031
337	Endothelial_cells	Macrophage	ANGPTL4	SDC2	0.000787103909163828	0	ANGPTL4_SDC2	ANGPTL4 - SDC2	ANGPTL	Secreted Signaling	PMID: 29017031
338	Hepatocytes_TOP2A_High	Macrophage	ANGPTL4	SDC2	0.000530199374077495	0	ANGPTL4_SDC2	ANGPTL4 - SDC2	ANGPTL	Secreted Signaling	PMID: 29017031
339	Hepatocytes_TOP2A_Low	Macrophage	ANGPTL4	SDC2	0.000661899786165175	0	ANGPTL4_SDC2	ANGPTL4 - SDC2	ANGPTL	Secreted Signaling	PMID: 29017031
340	Smooth_muscle_cells	Macrophage	ANGPTL4	SDC2	0.00172910898954321	0	ANGPTL4_SDC2	ANGPTL4 - SDC2	ANGPTL	Secreted Signaling	PMID: 29017031
341	Endothelial_cells	Smooth_muscle_cells	ANGPTL4	SDC2	0.00362674014621007	0	ANGPTL4_SDC2	ANGPTL4 - SDC2	ANGPTL	Secreted Signaling	PMID: 29017031
342	Hepatocytes_TOP2A_High	Smooth_muscle_cells	ANGPTL4	SDC2	0.00244526878795697	0	ANGPTL4_SDC2	ANGPTL4 - SDC2	ANGPTL	Secreted Signaling	PMID: 29017031
343	Hepatocytes_TOP2A_Low	Smooth_muscle_cells	ANGPTL4	SDC2	0.00305121619321781	0	ANGPTL4_SDC2	ANGPTL4 - SDC2	ANGPTL	Secreted Signaling	PMID: 29017031
344	Smooth_muscle_cells	Smooth_muscle_cells	ANGPTL4	SDC2	0.00794021284792403	0	ANGPTL4_SDC2	ANGPTL4 - SDC2	ANGPTL	Secreted Signaling	PMID: 29017031
345	Endothelial_cells	Macrophage	ANGPTL4	SDC3	0.000780058569043488	0	ANGPTL4_SDC3	ANGPTL4 - SDC3	ANGPTL	Secreted Signaling	PMID: 29017031
346	Hepatocytes_TOP2A_High	Macrophage	ANGPTL4	SDC3	0.000525452368395239	0	ANGPTL4_SDC3	ANGPTL4 - SDC3	ANGPTL	Secreted Signaling	PMID: 29017031
347	Hepatocytes_TOP2A_Low	Macrophage	ANGPTL4	SDC3	0.000655974408131421	0	ANGPTL4_SDC3	ANGPTL4 - SDC3	ANGPTL	Secreted Signaling	PMID: 29017031
348	Smooth_muscle_cells	Macrophage	ANGPTL4	SDC3	0.00171364625482583	0	ANGPTL4_SDC3	ANGPTL4 - SDC3	ANGPTL	Secreted Signaling	PMID: 29017031
349	Endothelial_cells	Hepatocytes_TOP2A_High	ANGPTL4	SDC4	0.00161206184137772	0	ANGPTL4_SDC4	ANGPTL4 - SDC4	ANGPTL	Secreted Signaling	PMID: 29017031
350	Hepatocytes_TOP2A_High	Hepatocytes_TOP2A_High	ANGPTL4	SDC4	0.00108619021306978	0	ANGPTL4_SDC4	ANGPTL4 - SDC4	ANGPTL	Secreted Signaling	PMID: 29017031
351	Hepatocytes_TOP2A_Low	Hepatocytes_TOP2A_High	ANGPTL4	SDC4	0.00135581023685778	0	ANGPTL4_SDC4	ANGPTL4 - SDC4	ANGPTL	Secreted Signaling	PMID: 29017031
352	Smooth_muscle_cells	Hepatocytes_TOP2A_High	ANGPTL4	SDC4	0.00353787992344392	0	ANGPTL4_SDC4	ANGPTL4 - SDC4	ANGPTL	Secreted Signaling	PMID: 29017031
353	Endothelial_cells	Hepatocytes_TOP2A_Low	ANGPTL4	SDC4	0.00109569458484756	0	ANGPTL4_SDC4	ANGPTL4 - SDC4	ANGPTL	Secreted Signaling	PMID: 29017031
354	Hepatocytes_TOP2A_High	Hepatocytes_TOP2A_Low	ANGPTL4	SDC4	0.000738142881955034	0	ANGPTL4_SDC4	ANGPTL4 - SDC4	ANGPTL	Secreted Signaling	PMID: 29017031
355	Hepatocytes_TOP2A_Low	Hepatocytes_TOP2A_Low	ANGPTL4	SDC4	0.000921448404529621	0	ANGPTL4_SDC4	ANGPTL4 - SDC4	ANGPTL	Secreted Signaling	PMID: 29017031
356	Smooth_muscle_cells	Hepatocytes_TOP2A_Low	ANGPTL4	SDC4	0.00240613130685326	0	ANGPTL4_SDC4	ANGPTL4 - SDC4	ANGPTL	Secreted Signaling	PMID: 29017031
357	Endothelial_cells	Endothelial_cells	ANGPT2	TEK	0.00152268603580476	0	ANGPT2_TEK	ANGPT2 - TEK	ANGPT	Secreted Signaling	PMID: 20651738
358	Smooth_muscle_cells	Endothelial_cells	ANGPT2	TEK	0.00115939446757709	0	ANGPT2_TEK	ANGPT2 - TEK	ANGPT	Secreted Signaling	PMID: 20651738
359	Endothelial_cells	Endothelial_cells	ANGPT2	ITGA5_ITGB1	0.00868616487380011	0	ANGPT2_ITGA5_ITGB1	ANGPT2 - (ITGA5+ITGB1)	ANGPT	Secreted Signaling	PMID: 20651738; PMID: 25635707
360	Smooth_muscle_cells	Endothelial_cells	ANGPT2	ITGA5_ITGB1	0.0066251078319819	0	ANGPT2_ITGA5_ITGB1	ANGPT2 - (ITGA5+ITGB1)	ANGPT	Secreted Signaling	PMID: 20651738; PMID: 25635707
361	Endothelial_cells	Hepatocytes_TOP2A_High	ANGPT2	ITGA5_ITGB1	0.00198708935622817	0	ANGPT2_ITGA5_ITGB1	ANGPT2 - (ITGA5+ITGB1)	ANGPT	Secreted Signaling	PMID: 20651738; PMID: 25635707
362	Smooth_muscle_cells	Hepatocytes_TOP2A_High	ANGPT2	ITGA5_ITGB1	0.00151316557272201	0	ANGPT2_ITGA5_ITGB1	ANGPT2 - (ITGA5+ITGB1)	ANGPT	Secreted Signaling	PMID: 20651738; PMID: 25635707
363	Endothelial_cells	Hepatocytes_TOP2A_High	MDK	SDC1	0.00338595375794833	0	MDK_SDC1	MDK - SDC1	MK	Secreted Signaling	PMID: 28356350
364	Hepatocytes_TOP2A_High	Hepatocytes_TOP2A_High	MDK	SDC1	0.024633024756665	0	MDK_SDC1	MDK - SDC1	MK	Secreted Signaling	PMID: 28356350
365	Hepatocytes_TOP2A_Low	Hepatocytes_TOP2A_High	MDK	SDC1	0.0171474660308878	0	MDK_SDC1	MDK - SDC1	MK	Secreted Signaling	PMID: 28356350
366	Macrophage	Hepatocytes_TOP2A_High	MDK	SDC1	0.0021018520093657	0	MDK_SDC1	MDK - SDC1	MK	Secreted Signaling	PMID: 28356350
367	Smooth_muscle_cells	Hepatocytes_TOP2A_High	MDK	SDC1	0.00468897723615853	0	MDK_SDC1	MDK - SDC1	MK	Secreted Signaling	PMID: 28356350
368	Endothelial_cells	Hepatocytes_TOP2A_Low	MDK	SDC1	0.00294267266380976	0	MDK_SDC1	MDK - SDC1	MK	Secreted Signaling	PMID: 28356350
369	Hepatocytes_TOP2A_High	Hepatocytes_TOP2A_Low	MDK	SDC1	0.0214680459043227	0	MDK_SDC1	MDK - SDC1	MK	Secreted Signaling	PMID: 28356350
370	Hepatocytes_TOP2A_Low	Hepatocytes_TOP2A_Low	MDK	SDC1	0.0149295489783485	0	MDK_SDC1	MDK - SDC1	MK	Secreted Signaling	PMID: 28356350
371	Macrophage	Hepatocytes_TOP2A_Low	MDK	SDC1	0.00182637441505508	0	MDK_SDC1	MDK - SDC1	MK	Secreted Signaling	PMID: 28356350
372	Smooth_muscle_cells	Hepatocytes_TOP2A_Low	MDK	SDC1	0.00407580502483256	0	MDK_SDC1	MDK - SDC1	MK	Secreted Signaling	PMID: 28356350
373	Hepatocytes_TOP2A_High	DC	MDK	SDC2	0.0115456597362953	0	MDK_SDC2	MDK - SDC2	MK	Secreted Signaling	PMID: 28356350
374	Hepatocytes_TOP2A_Low	DC	MDK	SDC2	0.00800449136253302	0	MDK_SDC2	MDK - SDC2	MK	Secreted Signaling	PMID: 28356350
375	Endothelial_cells	Hepatocytes_TOP2A_High	MDK	SDC2	0.00817799969681726	0	MDK_SDC2	MDK - SDC2	MK	Secreted Signaling	PMID: 28356350
376	Hepatocytes_TOP2A_High	Hepatocytes_TOP2A_High	MDK	SDC2	0.0577529053966786	0	MDK_SDC2	MDK - SDC2	MK	Secreted Signaling	PMID: 28356350
377	Hepatocytes_TOP2A_Low	Hepatocytes_TOP2A_High	MDK	SDC2	0.0406219440691659	0	MDK_SDC2	MDK - SDC2	MK	Secreted Signaling	PMID: 28356350
378	Macrophage	Hepatocytes_TOP2A_High	MDK	SDC2	0.00508581868131592	0	MDK_SDC2	MDK - SDC2	MK	Secreted Signaling	PMID: 28356350
379	Smooth_muscle_cells	Hepatocytes_TOP2A_High	MDK	SDC2	0.0113042386275876	0	MDK_SDC2	MDK - SDC2	MK	Secreted Signaling	PMID: 28356350
380	Endothelial_cells	Hepatocytes_TOP2A_Low	MDK	SDC2	0.00688408918197863	0	MDK_SDC2	MDK - SDC2	MK	Secreted Signaling	PMID: 28356350
381	Hepatocytes_TOP2A_High	Hepatocytes_TOP2A_Low	MDK	SDC2	0.0490028609323377	0	MDK_SDC2	MDK - SDC2	MK	Secreted Signaling	PMID: 28356350
382	Hepatocytes_TOP2A_Low	Hepatocytes_TOP2A_Low	MDK	SDC2	0.0343727005086797	0	MDK_SDC2	MDK - SDC2	MK	Secreted Signaling	PMID: 28356350
383	Macrophage	Hepatocytes_TOP2A_Low	MDK	SDC2	0.0042790375451812	0	MDK_SDC2	MDK - SDC2	MK	Secreted Signaling	PMID: 28356350
384	Smooth_muscle_cells	Hepatocytes_TOP2A_Low	MDK	SDC2	0.00952044731971009	0	MDK_SDC2	MDK - SDC2	MK	Secreted Signaling	PMID: 28356350
385	Hepatocytes_TOP2A_High	Macrophage	MDK	SDC2	0.0122165230434013	0	MDK_SDC2	MDK - SDC2	MK	Secreted Signaling	PMID: 28356350
386	Hepatocytes_TOP2A_Low	Macrophage	MDK	SDC2	0.00847135766857505	0	MDK_SDC2	MDK - SDC2	MK	Secreted Signaling	PMID: 28356350
387	Endothelial_cells	Smooth_muscle_cells	MDK	SDC2	0.00762929584024932	0	MDK_SDC2	MDK - SDC2	MK	Secreted Signaling	PMID: 28356350
388	Hepatocytes_TOP2A_High	Smooth_muscle_cells	MDK	SDC2	0.0540592637926415	0	MDK_SDC2	MDK - SDC2	MK	Secreted Signaling	PMID: 28356350
389	Hepatocytes_TOP2A_Low	Smooth_muscle_cells	MDK	SDC2	0.0379797671314205	0	MDK_SDC2	MDK - SDC2	MK	Secreted Signaling	PMID: 28356350
390	Macrophage	Smooth_muscle_cells	MDK	SDC2	0.00474359280641475	0	MDK_SDC2	MDK - SDC2	MK	Secreted Signaling	PMID: 28356350
391	Smooth_muscle_cells	Smooth_muscle_cells	MDK	SDC2	0.0105480101451431	0	MDK_SDC2	MDK - SDC2	MK	Secreted Signaling	PMID: 28356350
392	Endothelial_cells	Hepatocytes_TOP2A_High	MDK	SDC4	0.00339875564856327	0	MDK_SDC4	MDK - SDC4	MK	Secreted Signaling	PMID: 28356350
393	Hepatocytes_TOP2A_High	Hepatocytes_TOP2A_High	MDK	SDC4	0.0247241664032978	0	MDK_SDC4	MDK - SDC4	MK	Secreted Signaling	PMID: 28356350
394	Hepatocytes_TOP2A_Low	Hepatocytes_TOP2A_High	MDK	SDC4	0.017211400008657	0	MDK_SDC4	MDK - SDC4	MK	Secreted Signaling	PMID: 28356350
395	Macrophage	Hepatocytes_TOP2A_High	MDK	SDC4	0.00210980914117488	0	MDK_SDC4	MDK - SDC4	MK	Secreted Signaling	PMID: 28356350
396	Smooth_muscle_cells	Hepatocytes_TOP2A_High	MDK	SDC4	0.00470668243778638	0	MDK_SDC4	MDK - SDC4	MK	Secreted Signaling	PMID: 28356350
397	Endothelial_cells	Hepatocytes_TOP2A_Low	MDK	SDC4	0.00231140889890595	0	MDK_SDC4	MDK - SDC4	MK	Secreted Signaling	PMID: 28356350
398	Hepatocytes_TOP2A_High	Hepatocytes_TOP2A_Low	MDK	SDC4	0.0169301892270243	0	MDK_SDC4	MDK - SDC4	MK	Secreted Signaling	PMID: 28356350
399	Hepatocytes_TOP2A_Low	Hepatocytes_TOP2A_Low	MDK	SDC4	0.0117571758849081	0	MDK_SDC4	MDK - SDC4	MK	Secreted Signaling	PMID: 28356350
400	Macrophage	Hepatocytes_TOP2A_Low	MDK	SDC4	0.00143423509855618	0	MDK_SDC4	MDK - SDC4	MK	Secreted Signaling	PMID: 28356350
401	Smooth_muscle_cells	Hepatocytes_TOP2A_Low	MDK	SDC4	0.00320224177892913	0	MDK_SDC4	MDK - SDC4	MK	Secreted Signaling	PMID: 28356350
402	Endothelial_cells	DC	MDK	ITGA4_ITGB1	0.00193019577024315	0	MDK_ITGA4_ITGB1	MDK - (ITGA4+ITGB1)	MK	Secreted Signaling	PMID: 28356350
403	Hepatocytes_TOP2A_High	DC	MDK	ITGA4_ITGB1	0.014172197076176	0	MDK_ITGA4_ITGB1	MDK - (ITGA4+ITGB1)	MK	Secreted Signaling	PMID: 28356350
404	Hepatocytes_TOP2A_Low	DC	MDK	ITGA4_ITGB1	0.00983345786121837	0	MDK_ITGA4_ITGB1	MDK - (ITGA4+ITGB1)	MK	Secreted Signaling	PMID: 28356350
405	Macrophage	DC	MDK	ITGA4_ITGB1	0.00119751773742781	0	MDK_ITGA4_ITGB1	MDK - (ITGA4+ITGB1)	MK	Secreted Signaling	PMID: 28356350
406	Smooth_muscle_cells	DC	MDK	ITGA4_ITGB1	0.00267450034345618	0	MDK_ITGA4_ITGB1	MDK - (ITGA4+ITGB1)	MK	Secreted Signaling	PMID: 28356350
407	Endothelial_cells	Endothelial_cells	MDK	ITGA6_ITGB1	0.00828659592702781	0	MDK_ITGA6_ITGB1	MDK - (ITGA6+ITGB1)	MK	Secreted Signaling	PMID: 28356350
408	Hepatocytes_TOP2A_High	Endothelial_cells	MDK	ITGA6_ITGB1	0.0584809942875722	0	MDK_ITGA6_ITGB1	MDK - (ITGA6+ITGB1)	MK	Secreted Signaling	PMID: 28356350
409	Hepatocytes_TOP2A_Low	Endothelial_cells	MDK	ITGA6_ITGB1	0.0411434938886413	0	MDK_ITGA6_ITGB1	MDK - (ITGA6+ITGB1)	MK	Secreted Signaling	PMID: 28356350
410	Macrophage	Endothelial_cells	MDK	ITGA6_ITGB1	0.00515356698038476	0	MDK_ITGA6_ITGB1	MDK - (ITGA6+ITGB1)	MK	Secreted Signaling	PMID: 28356350
411	Smooth_muscle_cells	Endothelial_cells	MDK	ITGA6_ITGB1	0.0114538689919737	0	MDK_ITGA6_ITGB1	MDK - (ITGA6+ITGB1)	MK	Secreted Signaling	PMID: 28356350
412	Endothelial_cells	Hepatocytes_TOP2A_High	MDK	ITGA6_ITGB1	0.00141274316042354	0	MDK_ITGA6_ITGB1	MDK - (ITGA6+ITGB1)	MK	Secreted Signaling	PMID: 28356350
413	Hepatocytes_TOP2A_High	Hepatocytes_TOP2A_High	MDK	ITGA6_ITGB1	0.0104070932300123	0	MDK_ITGA6_ITGB1	MDK - (ITGA6+ITGB1)	MK	Secreted Signaling	PMID: 28356350
414	Hepatocytes_TOP2A_Low	Hepatocytes_TOP2A_High	MDK	ITGA6_ITGB1	0.00721258637379282	0	MDK_ITGA6_ITGB1	MDK - (ITGA6+ITGB1)	MK	Secreted Signaling	PMID: 28356350
415	Macrophage	Hepatocytes_TOP2A_High	MDK	ITGA6_ITGB1	0.000876311172218621	0	MDK_ITGA6_ITGB1	MDK - (ITGA6+ITGB1)	MK	Secreted Signaling	PMID: 28356350
416	Smooth_muscle_cells	Hepatocytes_TOP2A_High	MDK	ITGA6_ITGB1	0.0019579037815757	0	MDK_ITGA6_ITGB1	MDK - (ITGA6+ITGB1)	MK	Secreted Signaling	PMID: 28356350
417	Endothelial_cells	Hepatocytes_TOP2A_High	MDK	LRP1	0.00026623164874602	0	MDK_LRP1	MDK - LRP1	MK	Secreted Signaling	PMID: 28356350
418	Hepatocytes_TOP2A_High	Hepatocytes_TOP2A_High	MDK	LRP1	0.00197565965381057	0	MDK_LRP1	MDK - LRP1	MK	Secreted Signaling	PMID: 28356350
419	Hepatocytes_TOP2A_Low	Hepatocytes_TOP2A_High	MDK	LRP1	0.00136564994365086	0	MDK_LRP1	MDK - LRP1	MK	Secreted Signaling	PMID: 28356350
420	Macrophage	Hepatocytes_TOP2A_High	MDK	LRP1	0.000165069001544905	0	MDK_LRP1	MDK - LRP1	MK	Secreted Signaling	PMID: 28356350
421	Smooth_muscle_cells	Hepatocytes_TOP2A_High	MDK	LRP1	0.000369130788786816	0	MDK_LRP1	MDK - LRP1	MK	Secreted Signaling	PMID: 28356350
422	Endothelial_cells	Hepatocytes_TOP2A_Low	MDK	LRP1	0.000339674940336441	0	MDK_LRP1	MDK - LRP1	MK	Secreted Signaling	PMID: 28356350
423	Hepatocytes_TOP2A_High	Hepatocytes_TOP2A_Low	MDK	LRP1	0.00251948137308541	0	MDK_LRP1	MDK - LRP1	MK	Secreted Signaling	PMID: 28356350
424	Hepatocytes_TOP2A_Low	Hepatocytes_TOP2A_Low	MDK	LRP1	0.00174185293942834	0	MDK_LRP1	MDK - LRP1	MK	Secreted Signaling	PMID: 28356350
425	Macrophage	Hepatocytes_TOP2A_Low	MDK	LRP1	0.000210611205368669	0	MDK_LRP1	MDK - LRP1	MK	Secreted Signaling	PMID: 28356350
426	Smooth_muscle_cells	Hepatocytes_TOP2A_Low	MDK	LRP1	0.000470946708392992	0	MDK_LRP1	MDK - LRP1	MK	Secreted Signaling	PMID: 28356350
427	Endothelial_cells	Macrophage	MDK	LRP1	0.00114966703898457	0	MDK_LRP1	MDK - LRP1	MK	Secreted Signaling	PMID: 28356350
428	Hepatocytes_TOP2A_High	Macrophage	MDK	LRP1	0.00848334933261471	0	MDK_LRP1	MDK - LRP1	MK	Secreted Signaling	PMID: 28356350
429	Hepatocytes_TOP2A_Low	Macrophage	MDK	LRP1	0.00587583864647729	0	MDK_LRP1	MDK - LRP1	MK	Secreted Signaling	PMID: 28356350
430	Macrophage	Macrophage	MDK	LRP1	0.000713056221549816	0	MDK_LRP1	MDK - LRP1	MK	Secreted Signaling	PMID: 28356350
431	Smooth_muscle_cells	Macrophage	MDK	LRP1	0.0015934717387228	0	MDK_LRP1	MDK - LRP1	MK	Secreted Signaling	PMID: 28356350
432	Endothelial_cells	Smooth_muscle_cells	MDK	LRP1	0.000780261860515193	0	MDK_LRP1	MDK - LRP1	MK	Secreted Signaling	PMID: 28356350
433	Hepatocytes_TOP2A_High	Smooth_muscle_cells	MDK	LRP1	0.0057711374630155	0	MDK_LRP1	MDK - LRP1	MK	Secreted Signaling	PMID: 28356350
434	Hepatocytes_TOP2A_Low	Smooth_muscle_cells	MDK	LRP1	0.00399391609198776	0	MDK_LRP1	MDK - LRP1	MK	Secreted Signaling	PMID: 28356350
435	Macrophage	Smooth_muscle_cells	MDK	LRP1	0.000483872654743102	0	MDK_LRP1	MDK - LRP1	MK	Secreted Signaling	PMID: 28356350
436	Smooth_muscle_cells	Smooth_muscle_cells	MDK	LRP1	0.00108161990410677	0	MDK_LRP1	MDK - LRP1	MK	Secreted Signaling	PMID: 28356350
437	Hepatocytes_TOP2A_High	B_cell	MDK	NCL	0.057056916014399	0	MDK_NCL	MDK - NCL	MK	Secreted Signaling	PMID: 28356350
438	Hepatocytes_TOP2A_Low	B_cell	MDK	NCL	0.0401236114562533	0	MDK_NCL	MDK - NCL	MK	Secreted Signaling	PMID: 28356350
439	Smooth_muscle_cells	B_cell	MDK	NCL	0.0111613788286823	0	MDK_NCL	MDK - NCL	MK	Secreted Signaling	PMID: 28356350
440	Hepatocytes_TOP2A_High	DC	MDK	NCL	0.0515739171433449	0	MDK_NCL	MDK - NCL	MK	Secreted Signaling	PMID: 28356350
441	Hepatocytes_TOP2A_Low	DC	MDK	NCL	0.0362053727484915	0	MDK_NCL	MDK - NCL	MK	Secreted Signaling	PMID: 28356350
442	Smooth_muscle_cells	DC	MDK	NCL	0.0100418350930684	0.01	MDK_NCL	MDK - NCL	MK	Secreted Signaling	PMID: 28356350
443	Hepatocytes_TOP2A_High	Endothelial_cells	MDK	NCL	0.0413107021683978	0	MDK_NCL	MDK - NCL	MK	Secreted Signaling	PMID: 28356350
444	Hepatocytes_TOP2A_Low	Endothelial_cells	MDK	NCL	0.0289072838695011	0	MDK_NCL	MDK - NCL	MK	Secreted Signaling	PMID: 28356350
445	Hepatocytes_TOP2A_High	Hepatocytes_TOP2A_High	MDK	NCL	0.0551096150450777	0	MDK_NCL	MDK - NCL	MK	Secreted Signaling	PMID: 28356350
446	Hepatocytes_TOP2A_Low	Hepatocytes_TOP2A_High	MDK	NCL	0.038730491416944	0	MDK_NCL	MDK - NCL	MK	Secreted Signaling	PMID: 28356350
447	Smooth_muscle_cells	Hepatocytes_TOP2A_High	MDK	NCL	0.0107625727727605	0	MDK_NCL	MDK - NCL	MK	Secreted Signaling	PMID: 28356350
448	Hepatocytes_TOP2A_High	Hepatocytes_TOP2A_Low	MDK	NCL	0.0360929113684101	0	MDK_NCL	MDK - NCL	MK	Secreted Signaling	PMID: 28356350
449	Hepatocytes_TOP2A_Low	Hepatocytes_TOP2A_Low	MDK	NCL	0.0252149150536205	0	MDK_NCL	MDK - NCL	MK	Secreted Signaling	PMID: 28356350
450	Hepatocytes_TOP2A_High	Macrophage	MDK	NCL	0.0349263941792795	0	MDK_NCL	MDK - NCL	MK	Secreted Signaling	PMID: 28356350
451	Hepatocytes_TOP2A_Low	Macrophage	MDK	NCL	0.0243910765931612	0	MDK_NCL	MDK - NCL	MK	Secreted Signaling	PMID: 28356350
452	Hepatocytes_TOP2A_High	Monocyte	MDK	NCL	0.0366564904344065	0	MDK_NCL	MDK - NCL	MK	Secreted Signaling	PMID: 28356350
453	Hepatocytes_TOP2A_Low	Monocyte	MDK	NCL	0.0256131512078786	0	MDK_NCL	MDK - NCL	MK	Secreted Signaling	PMID: 28356350
454	Hepatocytes_TOP2A_High	NK/T cells	MDK	NCL	0.0516965308629446	0	MDK_NCL	MDK - NCL	MK	Secreted Signaling	PMID: 28356350
455	Hepatocytes_TOP2A_Low	NK/T cells	MDK	NCL	0.0362928468953435	0	MDK_NCL	MDK - NCL	MK	Secreted Signaling	PMID: 28356350
456	Smooth_muscle_cells	NK/T cells	MDK	NCL	0.0100667569617626	0	MDK_NCL	MDK - NCL	MK	Secreted Signaling	PMID: 28356350
457	Hepatocytes_TOP2A_High	Smooth_muscle_cells	MDK	NCL	0.0462740764469073	0	MDK_NCL	MDK - NCL	MK	Secreted Signaling	PMID: 28356350
458	Hepatocytes_TOP2A_Low	Smooth_muscle_cells	MDK	NCL	0.0324308316877739	0	MDK_NCL	MDK - NCL	MK	Secreted Signaling	PMID: 28356350
459	Smooth_muscle_cells	Smooth_muscle_cells	MDK	NCL	0.00896955265635236	0	MDK_NCL	MDK - NCL	MK	Secreted Signaling	PMID: 28356350
460	Smooth_muscle_cells	Hepatocytes_TOP2A_High	PTN	SDC1	0.00297627412680381	0	PTN_SDC1	PTN - SDC1	PTN	Secreted Signaling	PMID: 28356350; PMID: 25620911
461	Smooth_muscle_cells	Hepatocytes_TOP2A_Low	PTN	SDC1	0.00258648812965747	0	PTN_SDC1	PTN - SDC1	PTN	Secreted Signaling	PMID: 28356350; PMID: 25620911
462	Smooth_muscle_cells	DC	PTN	SDC2	0.00137873465137322	0	PTN_SDC2	PTN - SDC2	PTN	Secreted Signaling	PMID: 28356350; PMID: 25620911
463	Smooth_muscle_cells	Endothelial_cells	PTN	SDC2	0.000289248852563098	0	PTN_SDC2	PTN - SDC2	PTN	Secreted Signaling	PMID: 28356350; PMID: 25620911
464	Smooth_muscle_cells	Hepatocytes_TOP2A_High	PTN	SDC2	0.00719269646011041	0	PTN_SDC2	PTN - SDC2	PTN	Secreted Signaling	PMID: 28356350; PMID: 25620911
465	Smooth_muscle_cells	Hepatocytes_TOP2A_Low	PTN	SDC2	0.00605372758942103	0	PTN_SDC2	PTN - SDC2	PTN	Secreted Signaling	PMID: 28356350; PMID: 25620911
466	Smooth_muscle_cells	Macrophage	PTN	SDC2	0.00145971876013333	0	PTN_SDC2	PTN - SDC2	PTN	Secreted Signaling	PMID: 28356350; PMID: 25620911
467	Smooth_muscle_cells	Smooth_muscle_cells	PTN	SDC2	0.0067096544144959	0	PTN_SDC2	PTN - SDC2	PTN	Secreted Signaling	PMID: 28356350; PMID: 25620911
468	Smooth_muscle_cells	Macrophage	PTN	SDC3	0.00144666158409235	0	PTN_SDC3	PTN - SDC3	PTN	Secreted Signaling	PMID: 28356350; PMID: 25620911
469	Smooth_muscle_cells	Hepatocytes_TOP2A_High	PTN	SDC4	0.00298753171045651	0	PTN_SDC4	PTN - SDC4	PTN	Secreted Signaling	PMID: 28356350; PMID: 25620911
470	Smooth_muscle_cells	Hepatocytes_TOP2A_Low	PTN	SDC4	0.00203147758662728	0	PTN_SDC4	PTN - SDC4	PTN	Secreted Signaling	PMID: 28356350; PMID: 25620911
471	Smooth_muscle_cells	B_cell	PTN	NCL	0.00710142396599937	0	PTN_NCL	PTN - NCL	PTN	Secreted Signaling	PMID: 28356350; PMID: 25620911
472	Smooth_muscle_cells	DC	PTN	NCL	0.00638648444453247	0	PTN_NCL	PTN - NCL	PTN	Secreted Signaling	PMID: 28356350; PMID: 25620911
473	Smooth_muscle_cells	Endothelial_cells	PTN	NCL	0.00506752666741773	0	PTN_NCL	PTN - NCL	PTN	Secreted Signaling	PMID: 28356350; PMID: 25620911
474	Smooth_muscle_cells	Hepatocytes_TOP2A_High	PTN	NCL	0.00684667930134322	0	PTN_NCL	PTN - NCL	PTN	Secreted Signaling	PMID: 28356350; PMID: 25620911
475	Smooth_muscle_cells	Hepatocytes_TOP2A_Low	PTN	NCL	0.00440642684732151	0	PTN_NCL	PTN - NCL	PTN	Secreted Signaling	PMID: 28356350; PMID: 25620911
476	Smooth_muscle_cells	Macrophage	PTN	NCL	0.00425948634105879	0	PTN_NCL	PTN - NCL	PTN	Secreted Signaling	PMID: 28356350; PMID: 25620911
477	Smooth_muscle_cells	Monocyte	PTN	NCL	0.00447753008779255	0	PTN_NCL	PTN - NCL	PTN	Secreted Signaling	PMID: 28356350; PMID: 25620911
478	Smooth_muscle_cells	NK/T cells	PTN	NCL	0.00640239311937391	0	PTN_NCL	PTN - NCL	PTN	Secreted Signaling	PMID: 28356350; PMID: 25620911
479	Smooth_muscle_cells	Smooth_muscle_cells	PTN	NCL	0.00570227760171641	0	PTN_NCL	PTN - NCL	PTN	Secreted Signaling	PMID: 28356350; PMID: 25620911
480	DC	Macrophage	C3	C3AR1	0.00349746915592052	0	C3_C3AR1	C3 - C3AR1	COMPLEMENT	Secreted Signaling	KEGG: hsa04080
481	Endothelial_cells	Macrophage	C3	C3AR1	0.00447920547149248	0	C3_C3AR1	C3 - C3AR1	COMPLEMENT	Secreted Signaling	KEGG: hsa04080
482	Hepatocytes_TOP2A_High	Macrophage	C3	C3AR1	0.0169881576134199	0	C3_C3AR1	C3 - C3AR1	COMPLEMENT	Secreted Signaling	KEGG: hsa04080
483	Hepatocytes_TOP2A_Low	Macrophage	C3	C3AR1	0.0171172632242807	0	C3_C3AR1	C3 - C3AR1	COMPLEMENT	Secreted Signaling	KEGG: hsa04080
484	Macrophage	Macrophage	C3	C3AR1	0.00453460913578525	0	C3_C3AR1	C3 - C3AR1	COMPLEMENT	Secreted Signaling	KEGG: hsa04080
485	DC	Monocyte	C3	C3AR1	0.00131731726215435	0	C3_C3AR1	C3 - C3AR1	COMPLEMENT	Secreted Signaling	KEGG: hsa04080
486	Endothelial_cells	Monocyte	C3	C3AR1	0.00168812368468556	0	C3_C3AR1	C3 - C3AR1	COMPLEMENT	Secreted Signaling	KEGG: hsa04080
487	Hepatocytes_TOP2A_High	Monocyte	C3	C3AR1	0.00645302449985771	0	C3_C3AR1	C3 - C3AR1	COMPLEMENT	Secreted Signaling	KEGG: hsa04080
488	Hepatocytes_TOP2A_Low	Monocyte	C3	C3AR1	0.00650259544264894	0	C3_C3AR1	C3 - C3AR1	COMPLEMENT	Secreted Signaling	KEGG: hsa04080
489	Macrophage	Monocyte	C3	C3AR1	0.00170906349435164	0	C3_C3AR1	C3 - C3AR1	COMPLEMENT	Secreted Signaling	KEGG: hsa04080
490	DC	Macrophage	C3	ITGAX_ITGB2	0.0023577970221604	0	C3_ITGAX_ITGB2	C3 - (ITGAX+ITGB2)	COMPLEMENT	Secreted Signaling	PMID: 16234578
491	Endothelial_cells	Macrophage	C3	ITGAX_ITGB2	0.00302059813307727	0	C3_ITGAX_ITGB2	C3 - (ITGAX+ITGB2)	COMPLEMENT	Secreted Signaling	PMID: 16234578
492	Hepatocytes_TOP2A_High	Macrophage	C3	ITGAX_ITGB2	0.011503206385845	0	C3_ITGAX_ITGB2	C3 - (ITGAX+ITGB2)	COMPLEMENT	Secreted Signaling	PMID: 16234578
493	Hepatocytes_TOP2A_Low	Macrophage	C3	ITGAX_ITGB2	0.0115911193004503	0	C3_ITGAX_ITGB2	C3 - (ITGAX+ITGB2)	COMPLEMENT	Secreted Signaling	PMID: 16234578
494	Macrophage	Macrophage	C3	ITGAX_ITGB2	0.00305801558196172	0	C3_ITGAX_ITGB2	C3 - (ITGAX+ITGB2)	COMPLEMENT	Secreted Signaling	PMID: 16234578
495	DC	Monocyte	C3	ITGAX_ITGB2	0.00212780679590582	0	C3_ITGAX_ITGB2	C3 - (ITGAX+ITGB2)	COMPLEMENT	Secreted Signaling	PMID: 16234578
496	Endothelial_cells	Monocyte	C3	ITGAX_ITGB2	0.00272613194540483	0	C3_ITGAX_ITGB2	C3 - (ITGAX+ITGB2)	COMPLEMENT	Secreted Signaling	PMID: 16234578
497	Hepatocytes_TOP2A_High	Monocyte	C3	ITGAX_ITGB2	0.0103904224526969	0	C3_ITGAX_ITGB2	C3 - (ITGAX+ITGB2)	COMPLEMENT	Secreted Signaling	PMID: 16234578
498	Hepatocytes_TOP2A_Low	Monocyte	C3	ITGAX_ITGB2	0.0104699210257624	0	C3_ITGAX_ITGB2	C3 - (ITGAX+ITGB2)	COMPLEMENT	Secreted Signaling	PMID: 16234578
499	Macrophage	Monocyte	C3	ITGAX_ITGB2	0.00275991181268395	0	C3_ITGAX_ITGB2	C3 - (ITGAX+ITGB2)	COMPLEMENT	Secreted Signaling	PMID: 16234578
500	Hepatocytes_TOP2A_High	Macrophage	C5	C5AR1	0.00560978819387213	0	HC_C5AR1	HC - C5AR1	COMPLEMENT	Secreted Signaling	KEGG: hsa04080
501	Hepatocytes_TOP2A_Low	Macrophage	C5	C5AR1	0.00413896485323965	0	HC_C5AR1	HC - C5AR1	COMPLEMENT	Secreted Signaling	KEGG: hsa04080
502	Hepatocytes_TOP2A_High	Monocyte	C5	C5AR1	0.00270603102285178	0	HC_C5AR1	HC - C5AR1	COMPLEMENT	Secreted Signaling	KEGG: hsa04080
503	Hepatocytes_TOP2A_Low	Monocyte	C5	C5AR1	0.00199501270159474	0	HC_C5AR1	HC - C5AR1	COMPLEMENT	Secreted Signaling	KEGG: hsa04080
504	DC	Endothelial_cells	F2	F2R	0.00253334543751174	0	F2_F2R	F2 - F2R	PARs	Secreted Signaling	KEGG: hsa04080
505	Endothelial_cells	Endothelial_cells	F2	F2R	0.00222613323842826	0	F2_F2R	F2 - F2R	PARs	Secreted Signaling	KEGG: hsa04080
506	Hepatocytes_TOP2A_High	Endothelial_cells	F2	F2R	0.0210282937764668	0	F2_F2R	F2 - F2R	PARs	Secreted Signaling	KEGG: hsa04080
507	Hepatocytes_TOP2A_Low	Endothelial_cells	F2	F2R	0.0203742314931159	0	F2_F2R	F2 - F2R	PARs	Secreted Signaling	KEGG: hsa04080
508	Macrophage	Endothelial_cells	F2	F2R	0.00284796438865088	0	F2_F2R	F2 - F2R	PARs	Secreted Signaling	KEGG: hsa04080
509	DC	Smooth_muscle_cells	F2	F2R	0.00129886039977328	0	F2_F2R	F2 - F2R	PARs	Secreted Signaling	KEGG: hsa04080
510	Endothelial_cells	Smooth_muscle_cells	F2	F2R	0.00114117971236898	0	F2_F2R	F2 - F2R	PARs	Secreted Signaling	KEGG: hsa04080
511	Hepatocytes_TOP2A_High	Smooth_muscle_cells	F2	F2R	0.0108796255278801	0	F2_F2R	F2 - F2R	PARs	Secreted Signaling	KEGG: hsa04080
512	Hepatocytes_TOP2A_Low	Smooth_muscle_cells	F2	F2R	0.0105378287121093	0	F2_F2R	F2 - F2R	PARs	Secreted Signaling	KEGG: hsa04080
513	Macrophage	Smooth_muscle_cells	F2	F2R	0.00146039176308965	0	F2_F2R	F2 - F2R	PARs	Secreted Signaling	KEGG: hsa04080
514	Hepatocytes_TOP2A_High	Endothelial_cells	PLG	F2R	0.0131623569894324	0	PLG_F2R	PLG - F2RL3	PARs	Secreted Signaling	KEGG: hsa04080
515	Hepatocytes_TOP2A_Low	Endothelial_cells	PLG	F2R	0.0134113850598949	0	PLG_F2R	PLG - F2RL3	PARs	Secreted Signaling	KEGG: hsa04080
516	Hepatocytes_TOP2A_High	Smooth_muscle_cells	PLG	F2R	0.00678363898352109	0	PLG_F2R	PLG - F2RL3	PARs	Secreted Signaling	KEGG: hsa04080
517	Hepatocytes_TOP2A_Low	Smooth_muscle_cells	PLG	F2R	0.0069128289059379	0	PLG_F2R	PLG - F2RL3	PARs	Secreted Signaling	KEGG: hsa04080
518	NK/T cells	Endothelial_cells	GZMA	F2R	0.00995335335041844	0	GZMA_F2R	GZMA - F2R	PARs	Secreted Signaling	KEGG: hsa04080
519	NK/T cells	Smooth_muscle_cells	GZMA	F2R	0.00512170575970913	0	GZMA_F2R	GZMA - F2R	PARs	Secreted Signaling	KEGG: hsa04080
520	DC	Endothelial_cells	F2	F2RL3	0.000555838692621901	0	F2_F2RL3	F2 - F2RL3	PARs	Secreted Signaling	KEGG: hsa04080
521	Endothelial_cells	Endothelial_cells	F2	F2RL3	0.00048831618383751	0	F2_F2RL3	F2 - F2RL3	PARs	Secreted Signaling	KEGG: hsa04080
522	Hepatocytes_TOP2A_High	Endothelial_cells	F2	F2RL3	0.0046815553378362	0	F2_F2RL3	F2 - F2RL3	PARs	Secreted Signaling	KEGG: hsa04080
523	Hepatocytes_TOP2A_Low	Endothelial_cells	F2	F2RL3	0.00453358602968518	0	F2_F2RL3	F2 - F2RL3	PARs	Secreted Signaling	KEGG: hsa04080
524	Macrophage	Endothelial_cells	F2	F2RL3	0.000625022798500892	0	F2_F2RL3	F2 - F2RL3	PARs	Secreted Signaling	KEGG: hsa04080
525	NK/T cells	Endothelial_cells	GZMA	F2RL3	0.00219660998594319	0	GZMA_F2RL3	GZMA - F2RL3	PARs	Secreted Signaling	KEGG: hsa04080
526	Hepatocytes_TOP2A_High	Endothelial_cells	PLG	F2RL3	0.00291216240220572	0	PLG_F2RL3	PLG - F2RL3	PARs	Secreted Signaling	KEGG: hsa04080
527	Hepatocytes_TOP2A_Low	Endothelial_cells	PLG	F2RL3	0.00296784292378893	0	PLG_F2RL3	PLG - F2RL3	PARs	Secreted Signaling	KEGG: hsa04080
528	DC	Hepatocytes_TOP2A_High	F2	PARD3	0.000175911881682748	0	F2_PARD3	F2 - PARD3	PARs	Secreted Signaling	KEGG: hsa04080
529	Endothelial_cells	Hepatocytes_TOP2A_High	F2	PARD3	0.00015453521552928	0	F2_PARD3	F2 - PARD3	PARs	Secreted Signaling	KEGG: hsa04080
530	Hepatocytes_TOP2A_High	Hepatocytes_TOP2A_High	F2	PARD3	0.00148581140579624	0	F2_PARD3	F2 - PARD3	PARs	Secreted Signaling	KEGG: hsa04080
531	Hepatocytes_TOP2A_Low	Hepatocytes_TOP2A_High	F2	PARD3	0.00143870355542447	0	F2_PARD3	F2 - PARD3	PARs	Secreted Signaling	KEGG: hsa04080
532	Macrophage	Hepatocytes_TOP2A_High	F2	PARD3	0.000197816633710365	0	F2_PARD3	F2 - PARD3	PARs	Secreted Signaling	KEGG: hsa04080
533	NK/T cells	Hepatocytes_TOP2A_High	GZMA	PARD3	0.000695964292734425	0	GZMA_PARD3	GZMA - PARD3	PARs	Secreted Signaling	KEGG: hsa04080
534	Hepatocytes_TOP2A_High	Hepatocytes_TOP2A_High	PLG	PARD3	0.000923129043876695	0	PLG_PARD3	PLG - PARD3	PARs	Secreted Signaling	KEGG: hsa04080
535	Hepatocytes_TOP2A_Low	Hepatocytes_TOP2A_High	PLG	PARD3	0.000940815147715373	0	PLG_PARD3	PLG - PARD3	PARs	Secreted Signaling	KEGG: hsa04080
536	Endothelial_cells	Endothelial_cells	SEMA3G	NRP2_PLXNA2	0.00103160609818392	0	SEMA3G_NRP2_PLXNA2	SEMA3G - (NRP2+PLXNA2)	SEMA3	Secreted Signaling	PMID: 27533782
537	Endothelial_cells	Endothelial_cells	ADM	CALCRL	0.0241453857394505	0	ADM_CALCRL	ADM - CALCRL	CALCR	Secreted Signaling	KEGG: hsa04080
538	Hepatocytes_TOP2A_High	Endothelial_cells	ADM	CALCRL	0.00354316767605802	0	ADM_CALCRL	ADM - CALCRL	CALCR	Secreted Signaling	KEGG: hsa04080
539	Macrophage	Endothelial_cells	ADM	CALCRL	0.0116187103550044	0	ADM_CALCRL	ADM - CALCRL	CALCR	Secreted Signaling	KEGG: hsa04080
540	Monocyte	Endothelial_cells	ADM	CALCRL	0.00536436239487506	0	ADM_CALCRL	ADM - CALCRL	CALCR	Secreted Signaling	KEGG: hsa04080
541	B_cell	Macrophage	ANXA1	FPR1	0.000714153071404686	0	ANXA1_FPR1	ANXA1 - FPR1	ANNEXIN	Secreted Signaling	PMID: 23230437
542	DC	Macrophage	ANXA1	FPR1	0.00322913628030985	0	ANXA1_FPR1	ANXA1 - FPR1	ANNEXIN	Secreted Signaling	PMID: 23230437
543	Endothelial_cells	Macrophage	ANXA1	FPR1	0.00784085126111713	0	ANXA1_FPR1	ANXA1 - FPR1	ANNEXIN	Secreted Signaling	PMID: 23230437
544	Hepatocytes_TOP2A_High	Macrophage	ANXA1	FPR1	0.000217363769604642	0	ANXA1_FPR1	ANXA1 - FPR1	ANNEXIN	Secreted Signaling	PMID: 23230437
545	Macrophage	Macrophage	ANXA1	FPR1	0.0063679416747426	0	ANXA1_FPR1	ANXA1 - FPR1	ANNEXIN	Secreted Signaling	PMID: 23230437
546	Monocyte	Macrophage	ANXA1	FPR1	0.00857735342766587	0	ANXA1_FPR1	ANXA1 - FPR1	ANNEXIN	Secreted Signaling	PMID: 23230437
547	NK/T cells	Macrophage	ANXA1	FPR1	0.00714056269851106	0	ANXA1_FPR1	ANXA1 - FPR1	ANNEXIN	Secreted Signaling	PMID: 23230437
548	Smooth_muscle_cells	Macrophage	ANXA1	FPR1	0.00643632544557101	0	ANXA1_FPR1	ANXA1 - FPR1	ANNEXIN	Secreted Signaling	PMID: 23230437
549	B_cell	Monocyte	ANXA1	FPR1	0.00137626902618034	0	ANXA1_FPR1	ANXA1 - FPR1	ANNEXIN	Secreted Signaling	PMID: 23230437
550	DC	Monocyte	ANXA1	FPR1	0.00620849308782127	0	ANXA1_FPR1	ANXA1 - FPR1	ANNEXIN	Secreted Signaling	PMID: 23230437
551	Endothelial_cells	Monocyte	ANXA1	FPR1	0.0150111195465156	0	ANXA1_FPR1	ANXA1 - FPR1	ANNEXIN	Secreted Signaling	PMID: 23230437
552	Hepatocytes_TOP2A_High	Monocyte	ANXA1	FPR1	0.000419082383985734	0	ANXA1_FPR1	ANXA1 - FPR1	ANNEXIN	Secreted Signaling	PMID: 23230437
553	Macrophage	Monocyte	ANXA1	FPR1	0.0122078430523276	0	ANXA1_FPR1	ANXA1 - FPR1	ANNEXIN	Secreted Signaling	PMID: 23230437
554	Monocyte	Monocyte	ANXA1	FPR1	0.0164099953833585	0	ANXA1_FPR1	ANXA1 - FPR1	ANNEXIN	Secreted Signaling	PMID: 23230437
555	NK/T cells	Monocyte	ANXA1	FPR1	0.0136792634679594	0	ANXA1_FPR1	ANXA1 - FPR1	ANNEXIN	Secreted Signaling	PMID: 23230437
556	Smooth_muscle_cells	Monocyte	ANXA1	FPR1	0.0123381613727762	0	ANXA1_FPR1	ANXA1 - FPR1	ANNEXIN	Secreted Signaling	PMID: 23230437
557	Endothelial_cells	Macrophage	GAS6	AXL	0.00377730557798062	0	GAS6_AXL	GAS6 - AXL	GAS	Secreted Signaling	PMID: 27801848
558	Smooth_muscle_cells	Macrophage	GAS6	AXL	0.00206876903826332	0	GAS6_AXL	GAS6 - AXL	GAS	Secreted Signaling	PMID: 27801848
559	Endothelial_cells	Smooth_muscle_cells	GAS6	AXL	0.0105256894443472	0	GAS6_AXL	GAS6 - AXL	GAS	Secreted Signaling	PMID: 27801848
560	Smooth_muscle_cells	Smooth_muscle_cells	GAS6	AXL	0.00578246684183593	0	GAS6_AXL	GAS6 - AXL	GAS	Secreted Signaling	PMID: 27801848
561	Endothelial_cells	Macrophage	GAS6	MERTK	0.0023505755640112	0	GAS6_MERTK	GAS6 - MERTK	GAS	Secreted Signaling	PMID: 27801848
562	Smooth_muscle_cells	Macrophage	GAS6	MERTK	0.00128653874161631	0	GAS6_MERTK	GAS6 - MERTK	GAS	Secreted Signaling	PMID: 27801848
563	DC	B_cell	LGALS9	PTPRC	0.0279544139249316	0	LGALS9_CD45	LGALS9 - CD45	GALECTIN	Secreted Signaling	PMID: 30120235
564	Endothelial_cells	B_cell	LGALS9	PTPRC	0.00730820188548227	0	LGALS9_CD45	LGALS9 - CD45	GALECTIN	Secreted Signaling	PMID: 30120235
565	Macrophage	B_cell	LGALS9	PTPRC	0.0241670021365473	0	LGALS9_CD45	LGALS9 - CD45	GALECTIN	Secreted Signaling	PMID: 30120235
566	Monocyte	B_cell	LGALS9	PTPRC	0.00995735829660315	0	LGALS9_CD45	LGALS9 - CD45	GALECTIN	Secreted Signaling	PMID: 30120235
567	DC	DC	LGALS9	PTPRC	0.0287633172154205	0	LGALS9_CD45	LGALS9 - CD45	GALECTIN	Secreted Signaling	PMID: 30120235
568	Endothelial_cells	DC	LGALS9	PTPRC	0.00752430028561974	0	LGALS9_CD45	LGALS9 - CD45	GALECTIN	Secreted Signaling	PMID: 30120235
569	Macrophage	DC	LGALS9	PTPRC	0.0248691148321475	0	LGALS9_CD45	LGALS9 - CD45	GALECTIN	Secreted Signaling	PMID: 30120235
570	Monocyte	DC	LGALS9	PTPRC	0.0102509814834451	0	LGALS9_CD45	LGALS9 - CD45	GALECTIN	Secreted Signaling	PMID: 30120235
571	DC	Macrophage	LGALS9	PTPRC	0.0182209901862863	0	LGALS9_CD45	LGALS9 - CD45	GALECTIN	Secreted Signaling	PMID: 30120235
572	Endothelial_cells	Macrophage	LGALS9	PTPRC	0.00472859481321965	0	LGALS9_CD45	LGALS9 - CD45	GALECTIN	Secreted Signaling	PMID: 30120235
573	Macrophage	Macrophage	LGALS9	PTPRC	0.0157309725181179	0	LGALS9_CD45	LGALS9 - CD45	GALECTIN	Secreted Signaling	PMID: 30120235
574	Monocyte	Macrophage	LGALS9	PTPRC	0.00644874173849487	0	LGALS9_CD45	LGALS9 - CD45	GALECTIN	Secreted Signaling	PMID: 30120235
575	DC	Monocyte	LGALS9	PTPRC	0.0237314251814369	0	LGALS9_CD45	LGALS9 - CD45	GALECTIN	Secreted Signaling	PMID: 30120235
576	Endothelial_cells	Monocyte	LGALS9	PTPRC	0.00618433054056596	0	LGALS9_CD45	LGALS9 - CD45	GALECTIN	Secreted Signaling	PMID: 30120235
577	Macrophage	Monocyte	LGALS9	PTPRC	0.0205040973788363	0	LGALS9_CD45	LGALS9 - CD45	GALECTIN	Secreted Signaling	PMID: 30120235
578	Monocyte	Monocyte	LGALS9	PTPRC	0.00842955328151814	0	LGALS9_CD45	LGALS9 - CD45	GALECTIN	Secreted Signaling	PMID: 30120235
579	DC	NK/T cells	LGALS9	PTPRC	0.0402849085588676	0	LGALS9_CD45	LGALS9 - CD45	GALECTIN	Secreted Signaling	PMID: 30120235
580	Endothelial_cells	NK/T cells	LGALS9	PTPRC	0.0106314015938019	0	LGALS9_CD45	LGALS9 - CD45	GALECTIN	Secreted Signaling	PMID: 30120235
581	Macrophage	NK/T cells	LGALS9	PTPRC	0.0348868542615104	0	LGALS9_CD45	LGALS9 - CD45	GALECTIN	Secreted Signaling	PMID: 30120235
582	Monocyte	NK/T cells	LGALS9	PTPRC	0.0144676310946425	0	LGALS9_CD45	LGALS9 - CD45	GALECTIN	Secreted Signaling	PMID: 30120235
583	Endothelial_cells	Macrophage	PROS1	AXL	0.00112255496894369	0	PROS1_AXL	PROS1 - AXL	PROS	Secreted Signaling	PMID: 29531161
584	Hepatocytes_TOP2A_High	Macrophage	PROS1	AXL	0.00174923722016423	0	PROS1_AXL	PROS1 - AXL	PROS	Secreted Signaling	PMID: 29531161
585	Hepatocytes_TOP2A_Low	Macrophage	PROS1	AXL	0.00106910734268787	0	PROS1_AXL	PROS1 - AXL	PROS	Secreted Signaling	PMID: 29531161
586	Endothelial_cells	Smooth_muscle_cells	PROS1	AXL	0.00314303052854272	0	PROS1_AXL	PROS1 - AXL	PROS	Secreted Signaling	PMID: 29531161
587	Hepatocytes_TOP2A_High	Smooth_muscle_cells	PROS1	AXL	0.00489214760667228	0	PROS1_AXL	PROS1 - AXL	PROS	Secreted Signaling	PMID: 29531161
588	Hepatocytes_TOP2A_Low	Smooth_muscle_cells	PROS1	AXL	0.00299367136406123	0	PROS1_AXL	PROS1 - AXL	PROS	Secreted Signaling	PMID: 29531161
589	DC	DC	BTLA	TNFRSF14	0.000983641780375844	0	BTLA_TNFRSF14	BTLA - TNFRSF14	BTLA	Secreted Signaling	PMID: 21941365
590	DC	Endothelial_cells	BTLA	TNFRSF14	0.000865166611944102	0	BTLA_TNFRSF14	BTLA - TNFRSF14	BTLA	Secreted Signaling	PMID: 21941365
591	DC	Hepatocytes_TOP2A_High	BTLA	TNFRSF14	0.000397259187196975	0	BTLA_TNFRSF14	BTLA - TNFRSF14	BTLA	Secreted Signaling	PMID: 21941365
592	DC	Hepatocytes_TOP2A_Low	BTLA	TNFRSF14	0.000499464366429445	0	BTLA_TNFRSF14	BTLA - TNFRSF14	BTLA	Secreted Signaling	PMID: 21941365
593	DC	Macrophage	BTLA	TNFRSF14	0.00137774638499189	0	BTLA_TNFRSF14	BTLA - TNFRSF14	BTLA	Secreted Signaling	PMID: 21941365
594	DC	Monocyte	BTLA	TNFRSF14	0.00113483531102717	0	BTLA_TNFRSF14	BTLA - TNFRSF14	BTLA	Secreted Signaling	PMID: 21941365
595	DC	DC	LGALS9	HAVCR2	0.0159878095051626	0	LGALS9_HAVCR2	LGALS9 - HAVCR2	GALECTIN	Secreted Signaling	PMID: 27192565
596	Endothelial_cells	DC	LGALS9	HAVCR2	0.00414207742295202	0	LGALS9_HAVCR2	LGALS9 - HAVCR2	GALECTIN	Secreted Signaling	PMID: 27192565
597	Macrophage	DC	LGALS9	HAVCR2	0.0137986813874365	0	LGALS9_HAVCR2	LGALS9 - HAVCR2	GALECTIN	Secreted Signaling	PMID: 27192565
598	Monocyte	DC	LGALS9	HAVCR2	0.00565007492456403	0	LGALS9_HAVCR2	LGALS9 - HAVCR2	GALECTIN	Secreted Signaling	PMID: 27192565
599	DC	Macrophage	LGALS9	HAVCR2	0.00547718872002664	0	LGALS9_HAVCR2	LGALS9 - HAVCR2	GALECTIN	Secreted Signaling	PMID: 27192565
600	Endothelial_cells	Macrophage	LGALS9	HAVCR2	0.00140787286096404	0	LGALS9_HAVCR2	LGALS9 - HAVCR2	GALECTIN	Secreted Signaling	PMID: 27192565
601	Macrophage	Macrophage	LGALS9	HAVCR2	0.00472032188217207	0	LGALS9_HAVCR2	LGALS9 - HAVCR2	GALECTIN	Secreted Signaling	PMID: 27192565
602	Monocyte	Macrophage	LGALS9	HAVCR2	0.00192235574319386	0	LGALS9_HAVCR2	LGALS9 - HAVCR2	GALECTIN	Secreted Signaling	PMID: 27192565
603	DC	Monocyte	LGALS9	HAVCR2	0.00463536569423807	0	LGALS9_HAVCR2	LGALS9 - HAVCR2	GALECTIN	Secreted Signaling	PMID: 27192565
604	Endothelial_cells	Monocyte	LGALS9	HAVCR2	0.0011907393338753	0	LGALS9_HAVCR2	LGALS9 - HAVCR2	GALECTIN	Secreted Signaling	PMID: 27192565
605	Macrophage	Monocyte	LGALS9	HAVCR2	0.00399435919096408	0	LGALS9_HAVCR2	LGALS9 - HAVCR2	GALECTIN	Secreted Signaling	PMID: 27192565
606	Monocyte	Monocyte	LGALS9	HAVCR2	0.00162600371096815	0	LGALS9_HAVCR2	LGALS9 - HAVCR2	GALECTIN	Secreted Signaling	PMID: 27192565
607	DC	B_cell	LGALS9	CD44	0.0266396806605634	0	LGALS9_CD44	LGALS9 - CD44	GALECTIN	Secreted Signaling	PMID: 25065622
608	Endothelial_cells	B_cell	LGALS9	CD44	0.0069575372434262	0	LGALS9_CD44	LGALS9 - CD44	GALECTIN	Secreted Signaling	PMID: 25065622
609	Macrophage	B_cell	LGALS9	CD44	0.0230261763468322	0	LGALS9_CD44	LGALS9 - CD44	GALECTIN	Secreted Signaling	PMID: 25065622
610	Monocyte	B_cell	LGALS9	CD44	0.00948079492758206	0	LGALS9_CD44	LGALS9 - CD44	GALECTIN	Secreted Signaling	PMID: 25065622
611	DC	DC	LGALS9	CD44	0.0109195010751326	0	LGALS9_CD44	LGALS9 - CD44	GALECTIN	Secreted Signaling	PMID: 25065622
612	Endothelial_cells	DC	LGALS9	CD44	0.00281823903490963	0	LGALS9_CD44	LGALS9 - CD44	GALECTIN	Secreted Signaling	PMID: 25065622
613	Macrophage	DC	LGALS9	CD44	0.0094177083691833	0	LGALS9_CD44	LGALS9 - CD44	GALECTIN	Secreted Signaling	PMID: 25065622
614	Monocyte	DC	LGALS9	CD44	0.00384613087006836	0	LGALS9_CD44	LGALS9 - CD44	GALECTIN	Secreted Signaling	PMID: 25065622
615	DC	Macrophage	LGALS9	CD44	0.0207127668757496	0	LGALS9_CD44	LGALS9 - CD44	GALECTIN	Secreted Signaling	PMID: 25065622
616	Endothelial_cells	Macrophage	LGALS9	CD44	0.00538536585875164	0	LGALS9_CD44	LGALS9 - CD44	GALECTIN	Secreted Signaling	PMID: 25065622
617	Macrophage	Macrophage	LGALS9	CD44	0.0178884359775418	0	LGALS9_CD44	LGALS9 - CD44	GALECTIN	Secreted Signaling	PMID: 25065622
618	Monocyte	Macrophage	LGALS9	CD44	0.00734266737274993	0	LGALS9_CD44	LGALS9 - CD44	GALECTIN	Secreted Signaling	PMID: 25065622
619	DC	Monocyte	LGALS9	CD44	0.0284161139521948	0	LGALS9_CD44	LGALS9 - CD44	GALECTIN	Secreted Signaling	PMID: 25065622
620	Endothelial_cells	Monocyte	LGALS9	CD44	0.00743151243249082	0	LGALS9_CD44	LGALS9 - CD44	GALECTIN	Secreted Signaling	PMID: 25065622
621	Macrophage	Monocyte	LGALS9	CD44	0.024567729597938	0	LGALS9_CD44	LGALS9 - CD44	GALECTIN	Secreted Signaling	PMID: 25065622
622	Monocyte	Monocyte	LGALS9	CD44	0.0101249118855189	0	LGALS9_CD44	LGALS9 - CD44	GALECTIN	Secreted Signaling	PMID: 25065622
623	DC	NK/T cells	LGALS9	CD44	0.0284607604348721	0	LGALS9_CD44	LGALS9 - CD44	GALECTIN	Secreted Signaling	PMID: 25065622
624	Endothelial_cells	NK/T cells	LGALS9	CD44	0.00744344117572852	0	LGALS9_CD44	LGALS9 - CD44	GALECTIN	Secreted Signaling	PMID: 25065622
625	Macrophage	NK/T cells	LGALS9	CD44	0.024606482756624	0	LGALS9_CD44	LGALS9 - CD44	GALECTIN	Secreted Signaling	PMID: 25065622
626	Monocyte	NK/T cells	LGALS9	CD44	0.0101411197857373	0	LGALS9_CD44	LGALS9 - CD44	GALECTIN	Secreted Signaling	PMID: 25065622
627	DC	Smooth_muscle_cells	LGALS9	CD44	0.00671617636067159	0	LGALS9_CD44	LGALS9 - CD44	GALECTIN	Secreted Signaling	PMID: 25065622
628	Endothelial_cells	Smooth_muscle_cells	LGALS9	CD44	0.00172794528387774	0	LGALS9_CD44	LGALS9 - CD44	GALECTIN	Secreted Signaling	PMID: 25065622
629	Macrophage	Smooth_muscle_cells	LGALS9	CD44	0.00578909628200355	0	LGALS9_CD44	LGALS9 - CD44	GALECTIN	Secreted Signaling	PMID: 25065622
630	Monocyte	Smooth_muscle_cells	LGALS9	CD44	0.00235911679584693	0	LGALS9_CD44	LGALS9 - CD44	GALECTIN	Secreted Signaling	PMID: 25065622
