# Supplementary material for: TOP2A Drives Hepatocellular Carcinoma Progression: Integrative Multi-Omics Analysis Reveals Prognostic Power and Actionable Mechanisms
Source: Research Square preprint supplement (doi:10.21203/rs.3.rs-6698064/v1), 2025-06-08
Supplement: Supplementary file 2 [file 1263c0c7e640a564b21ec0ff.docx]

**Supplementary materials**

**Supplementary tables**

Supplementary table 1. Table for Analysis of Intercellular Communication Network

**Supplementary figures**


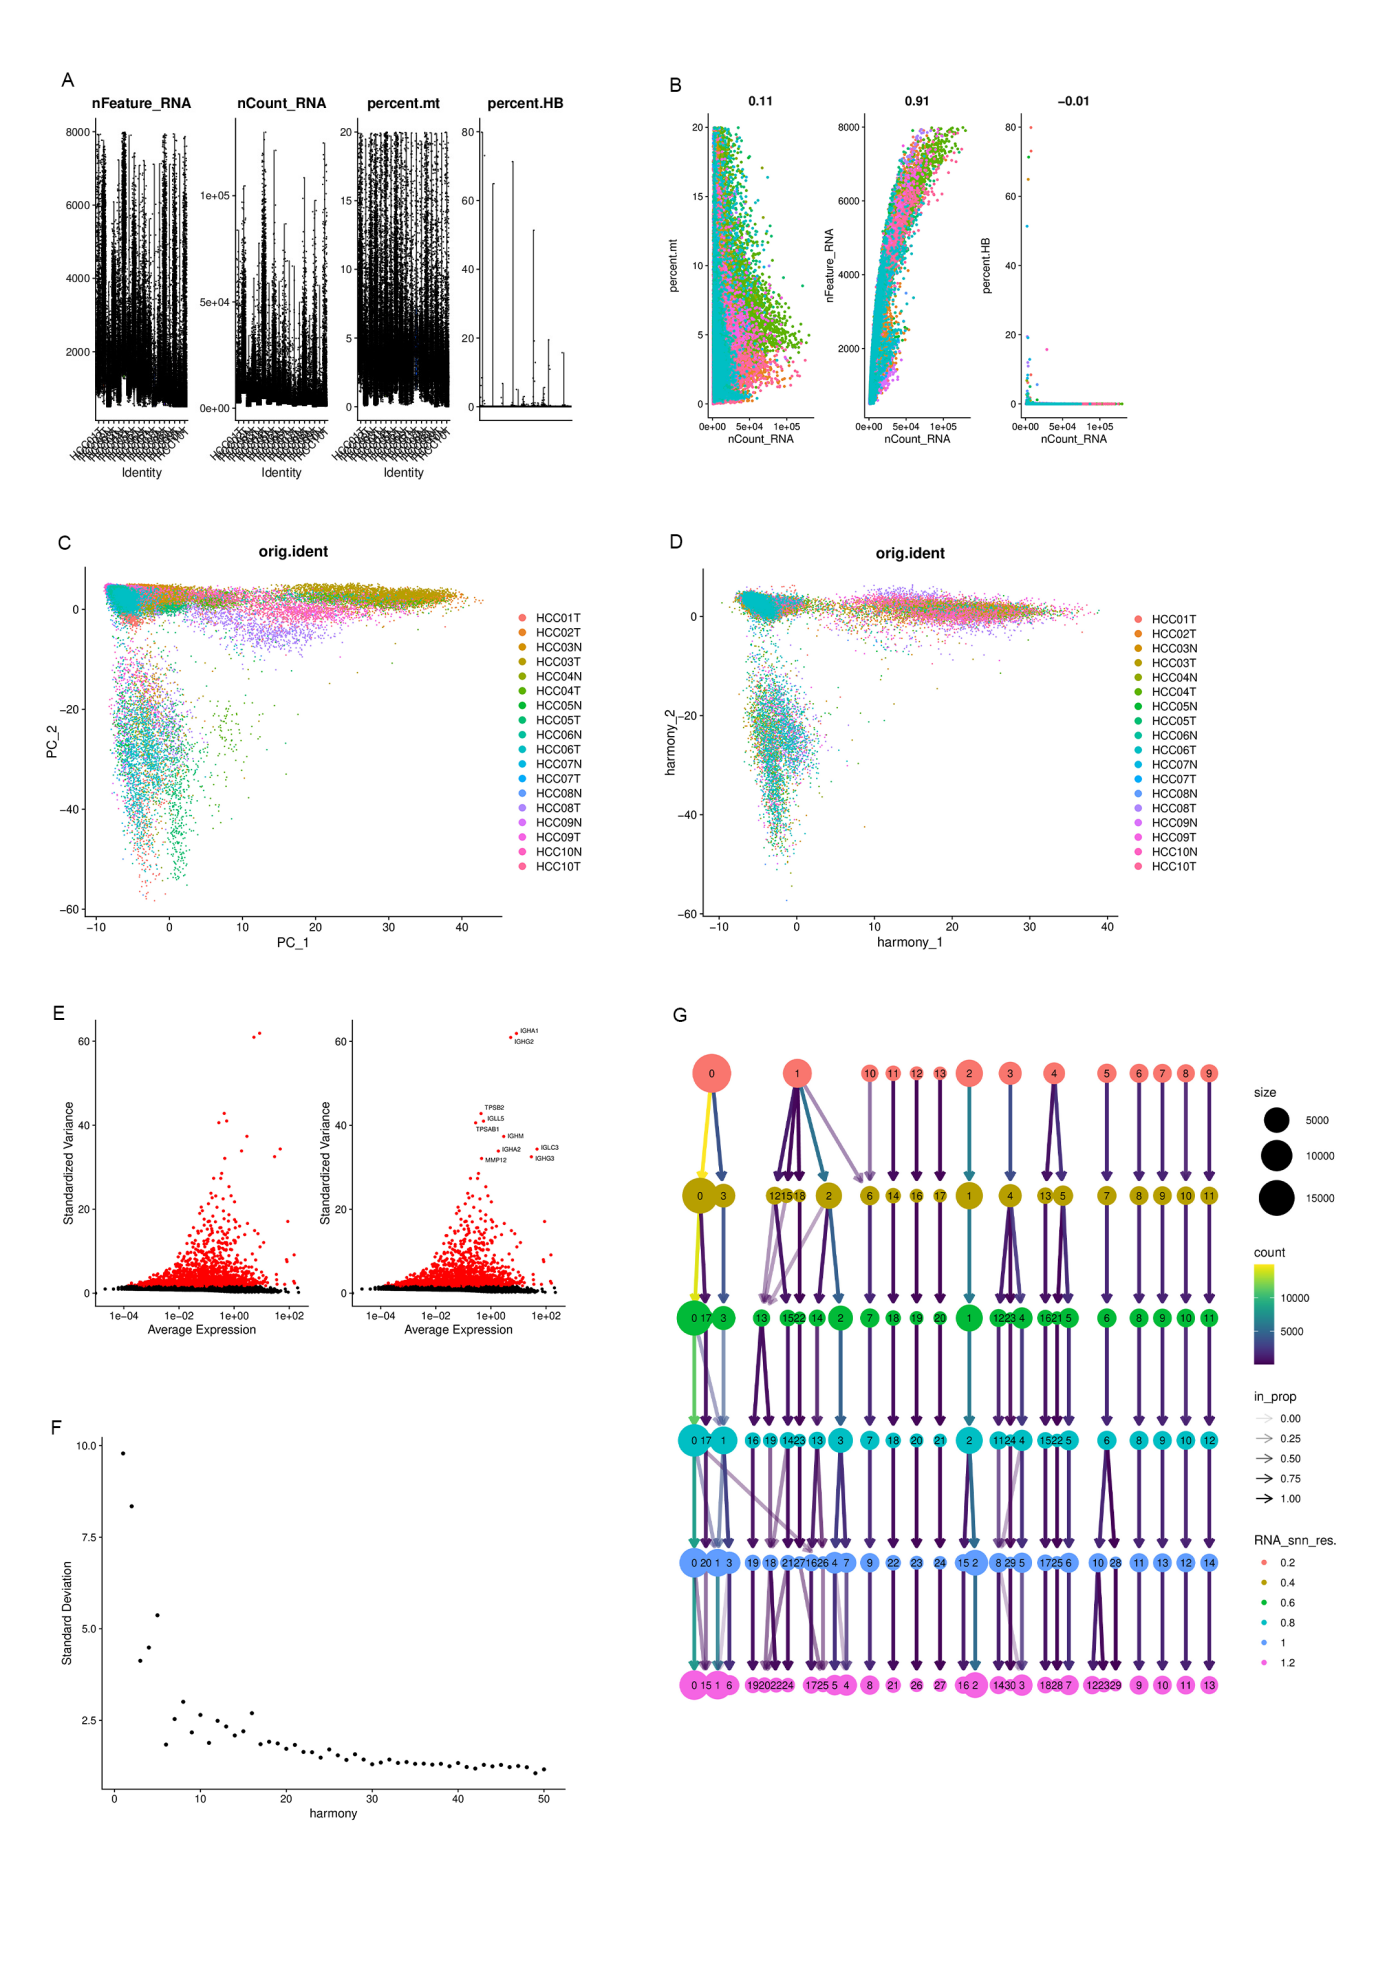


**Figure S1 Annotation of Single-Cell Data**


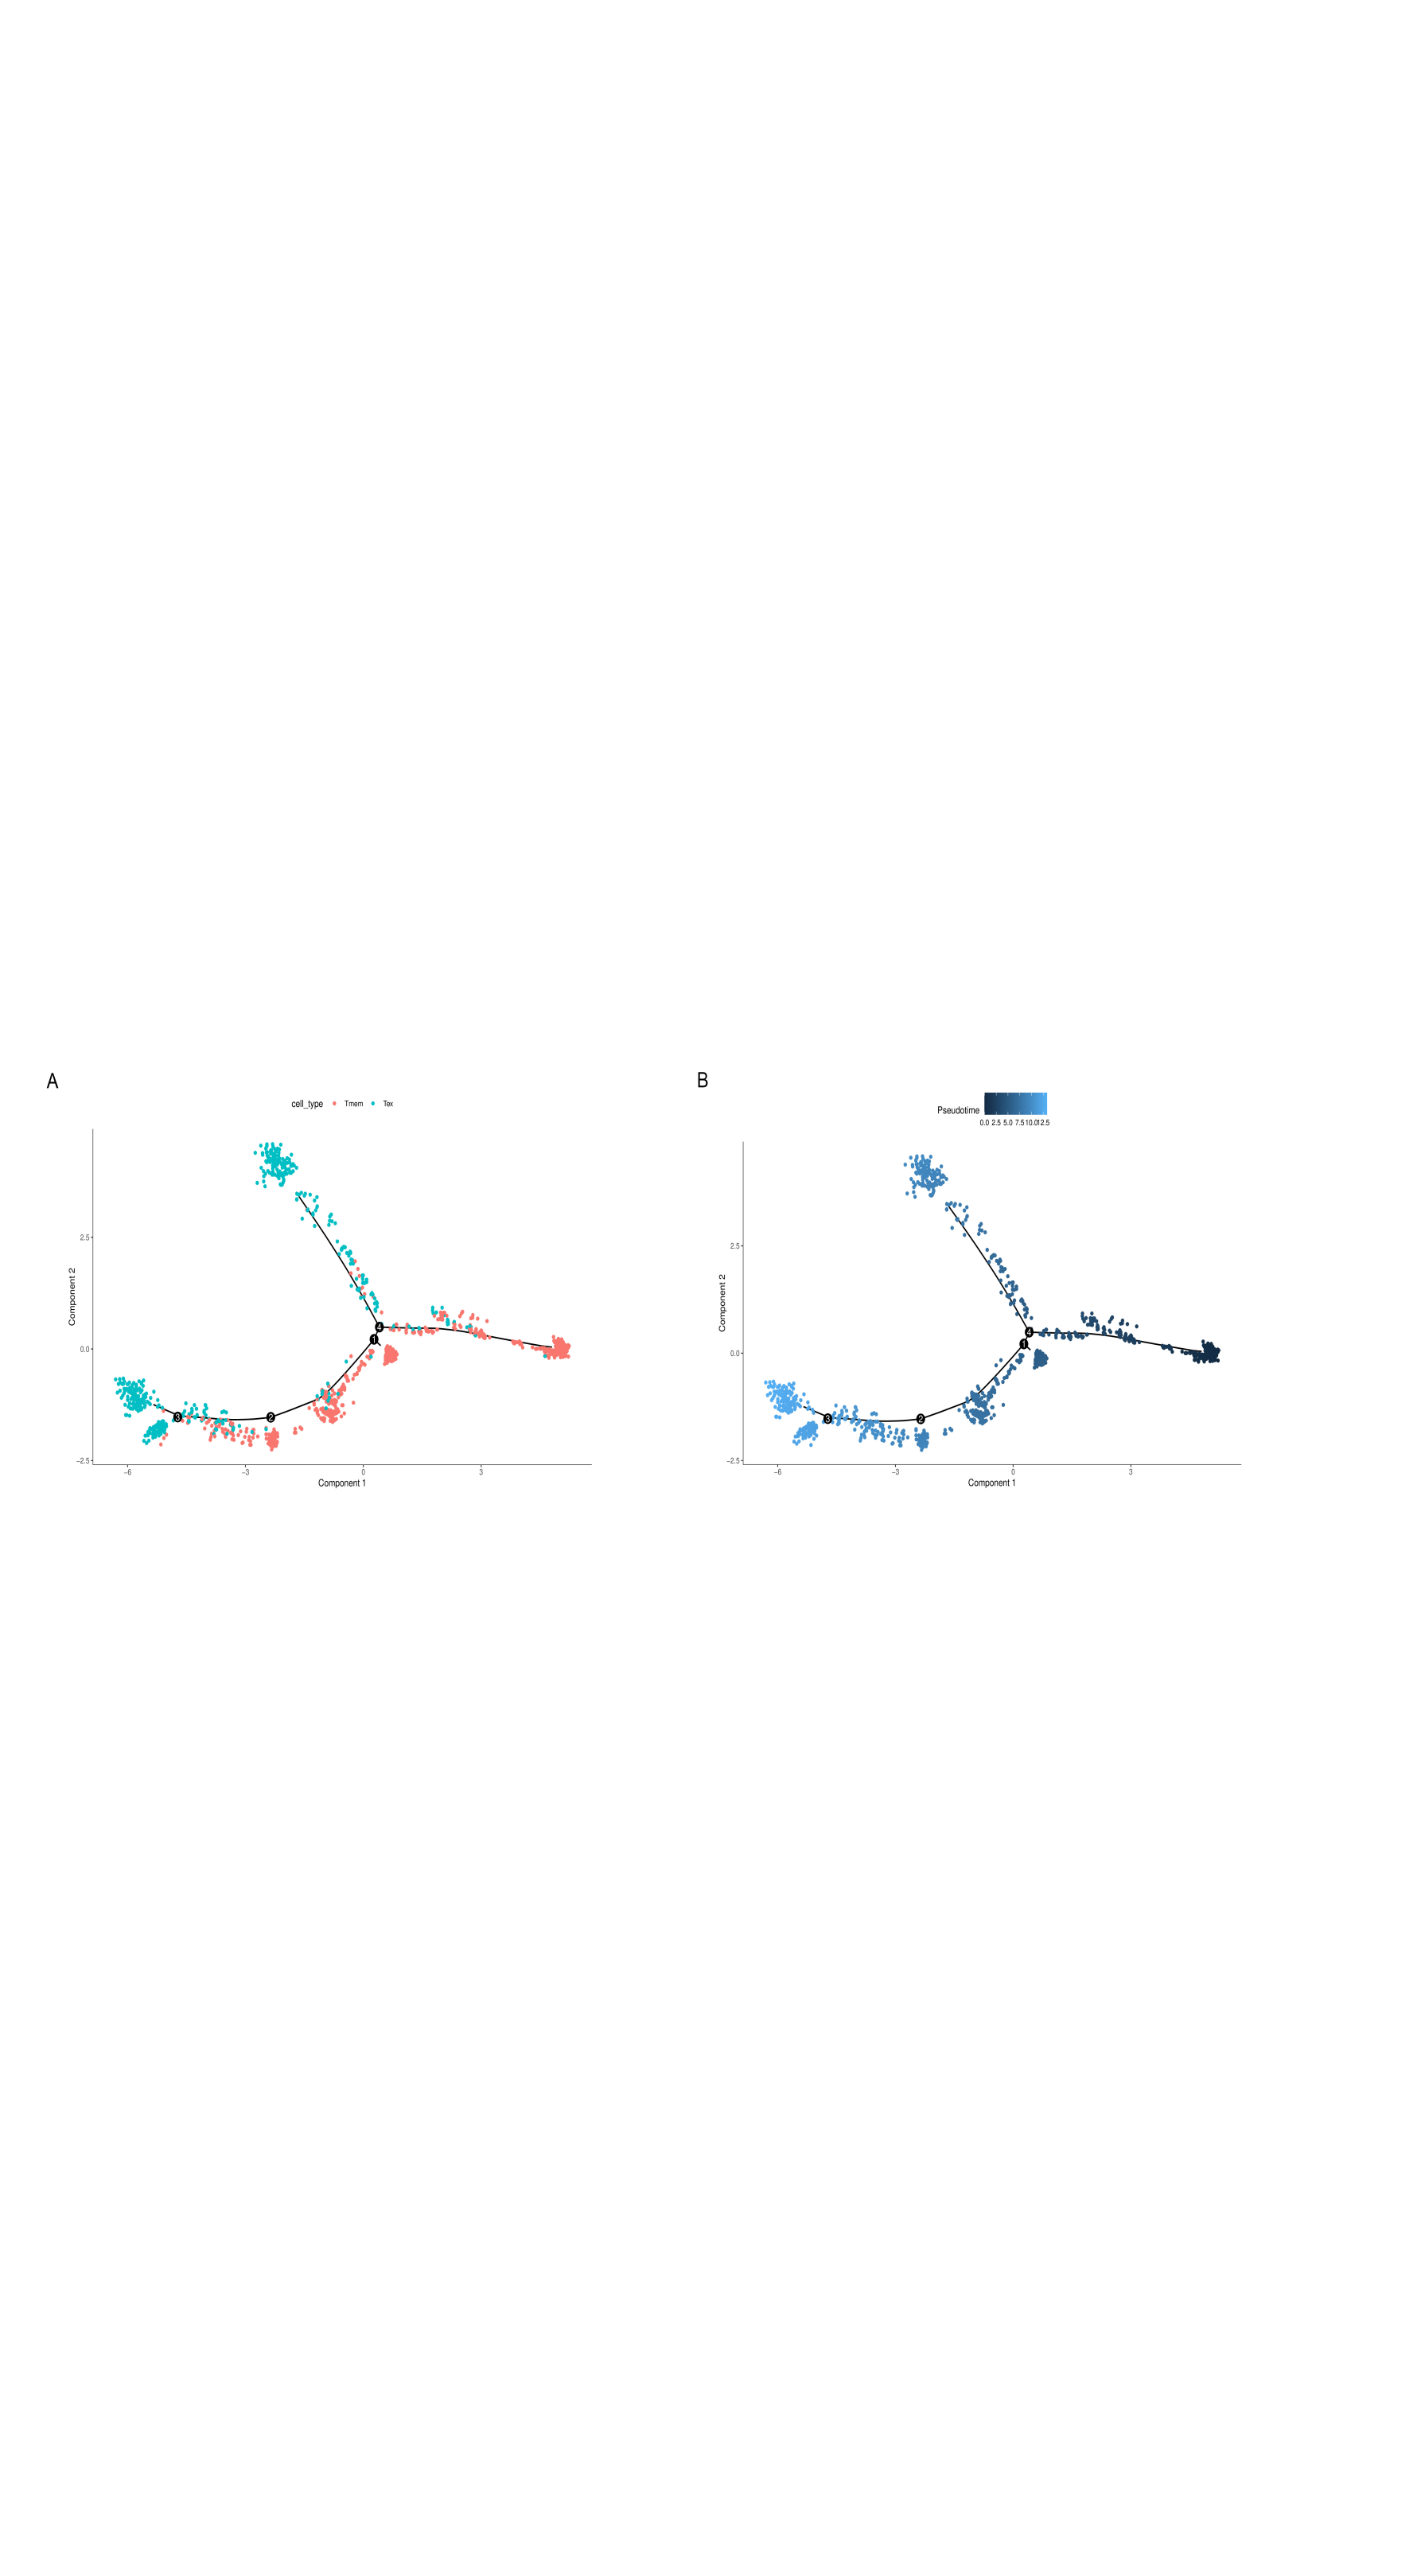


**Figure S2 The results of** **pseudotime analysis of Tmem and Tex cells.** (A) UMAP visualization demonstrated the pseudotime distribution pattern of Tmem and Tex cells. (B) UMAP visualized a pseudotime arrangement of Tmem and Tex cells.
